# Supplementary material for: Design and Synthesis of 2-(4-Bromophenyl)Quinoline-4-Carbohydrazide Derivatives via Molecular Hybridization as Novel Microbial DNA-Gyrase Inhibitors
Source: PubMed Central journal article supplement — ACS Omega. 2023 May 11;8(20):17948–65. doi: 10.1021/acsomega.3c01156 (PMC10210181; doi:10.1021/acsomega.3c01156), 2023-05-11
Supplement: ao3c01156_si_001.pdf [file ao3c01156_si_001.pdf]

## **Design and Synthesis of 2-(4-bromophenyl)quinoline-4-carbohydrazide Derivatives via Molecular Hybridization as Novel Microbial DNA-gyrase Inhibitors**

Hany M. Abd El-Lateef <sup>a,b</sup>, Ayman Abo Elmaaty <sup>c</sup>, Lina M. A. Abdel Ghany <sup>d</sup>, Mohamed S. Abdel-Aziz <sup>e</sup>, Islam Zaki <sup>f,\*</sup>, Noha Ryad <sup>g</sup>

<sup>a</sup> *Department of Chemistry, College of Science, King Faisal University, Al-Ahsa 31982, Saudi Arabia*

<sup>b</sup> *Department of Chemistry, Faculty of Science, Sohag University, Sohag 82524, Egypt*

<sup>c</sup> *Medicinal Chemistry Department, Faculty of Pharmacy, Port Said University, Port Said 42526, Egypt.*

<sup>d</sup> *Pharmaceutical Chemistry Department, College of Pharmaceutical Sciences and Drug Manufacturing, Misr University for Science and Technology, 6th of October City, Egypt*

<sup>e</sup> *Microbial Chemistry Department, Biotechnology Research Institute, National Research Centre, Cairo, Egypt.*

<sup>f</sup> *Pharmaceutical Organic Chemistry Department, Faculty of pharmacy, Port Said University, Port Said, Egypt.*

<sup>g</sup> *Pharmaceutical Organic Chemistry Department, College of Pharmaceutical Sciences and Drug Manufacturing, Misr University for Science and Technology, 6th of October City, Giza, P.O. Box 77, Egypt.*

---

\* Corresponding author

**Islam Zaki**

**Email:** [eslam.zaki@pharm.psu.edu.eg](mailto:eslam.zaki@pharm.psu.edu.eg)

### **Supplementary data**

**The supplementary data are divided into three parts:**

- 1. The molecular docking studies (pages S2-S10)**
- 2. Spectral data (<sup>1</sup>H-NMR, <sup>13</sup>C-NMR and MS) of all synthesized compounds (pages S11-S55)**
- 3. Biological Studies (pages S56-S62)**

## Part 1: Molecular docking studies:

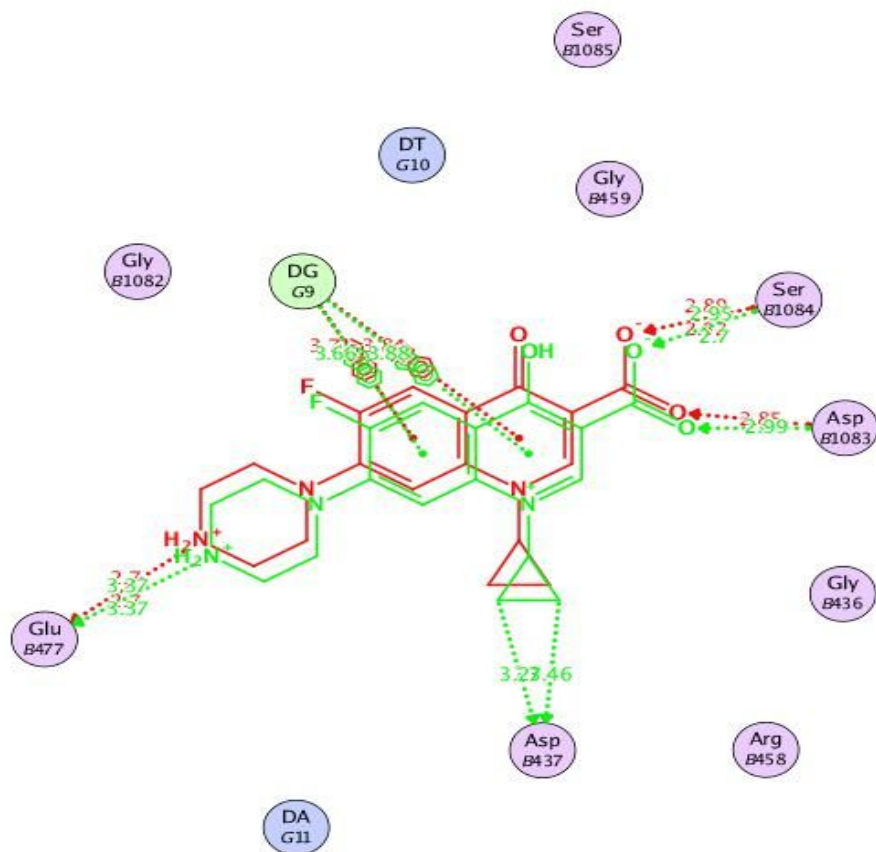

**Figure S1:** The 2D superimposition of the native co-crystallized ciprofloxacin, and the re-docked co-crystallized Ciprofloxacin at *S. aureus* DNA gyrase target protein

| No. | 2D interactions                                                                                                                                                                                                                                                                                                                                                                                                                                                                                                                                                              | 3D interactions                                                                                                                                                                                                                                                                                                                        | 3D protein positioning                                                                                                                                                                                                                                                            |
|-----|------------------------------------------------------------------------------------------------------------------------------------------------------------------------------------------------------------------------------------------------------------------------------------------------------------------------------------------------------------------------------------------------------------------------------------------------------------------------------------------------------------------------------------------------------------------------------|----------------------------------------------------------------------------------------------------------------------------------------------------------------------------------------------------------------------------------------------------------------------------------------------------------------------------------------|-----------------------------------------------------------------------------------------------------------------------------------------------------------------------------------------------------------------------------------------------------------------------------------|
| 5   | 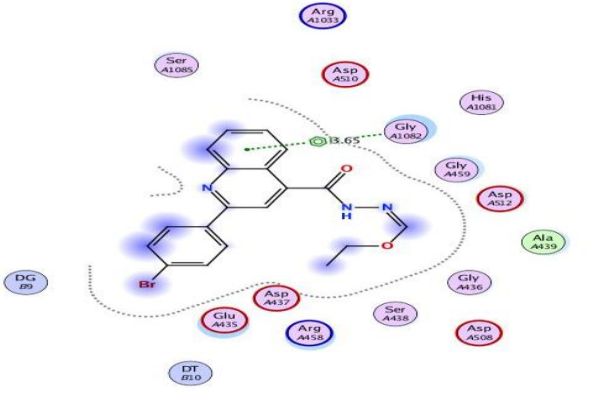 <p>2D interaction diagram for compound 5. The ligand is shown with various interactions highlighted by dashed lines and circles. Key interactions include hydrogen bonds (3.65 Å) and other contacts with residues: Arg A1033, Asp A510, His A1081, Gly A1082, Gly A439, Asp A512, Ala A439, Gly A436, Ser A438, Asp A508, Arg A458, Ser A439, Glu A435, Asp A437, and DT #10. Other residues shown include Ser A1085, DA #11, His A1081, Asp A1081, Gly A1082, DC #9, DT #10, and Br.</p> |  <p>3D interaction diagram for compound 5. The ligand is shown in stick representation within the protein binding pocket (yellow ribbon). Key interactions are highlighted with dashed lines, including a hydrogen bond (3.65 Å) with Gly1082.</p>   |  <p>3D protein positioning for compound 5. The protein surface is shown in yellow, and the ligand is shown as a space-filling model (red, blue, and white spheres) bound to the protein.</p>   |
| 6a  |  <p>2D interaction diagram for compound 6a. The ligand is shown with various interactions highlighted by dashed lines and circles. Key interactions include hydrogen bonds (3.39 Å, 3.15 Å, 3.46 Å) and other contacts with residues: Ser A1084, DA #11, Gly A1082, Asp A512, Gly A439, His A1081, Asp A1081, Glu A435, Lys A460, Gly A436, DC #9, DT #10, Asp A437, Arg A458, Asp A437, and Br.</p>                                                                                       |  <p>3D interaction diagram for compound 6a. The ligand is shown in stick representation within the protein binding pocket (yellow ribbon). Key interactions are highlighted with dashed lines, including hydrogen bonds with Glu435 and Asp437.</p> |  <p>3D protein positioning for compound 6a. The protein surface is shown in yellow, and the ligand is shown as a space-filling model (red, blue, and white spheres) bound to the protein.</p> |

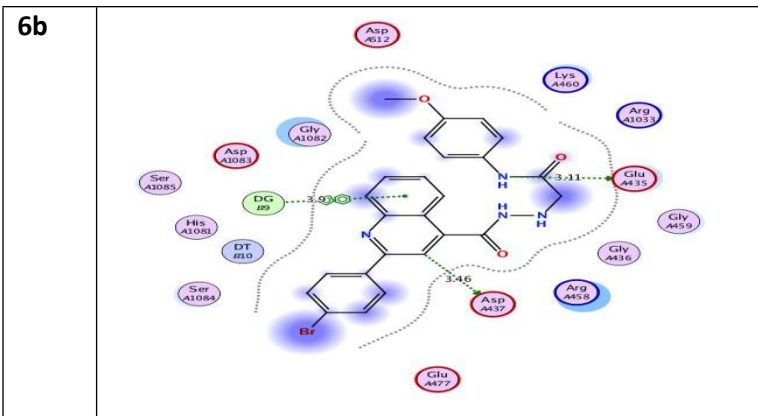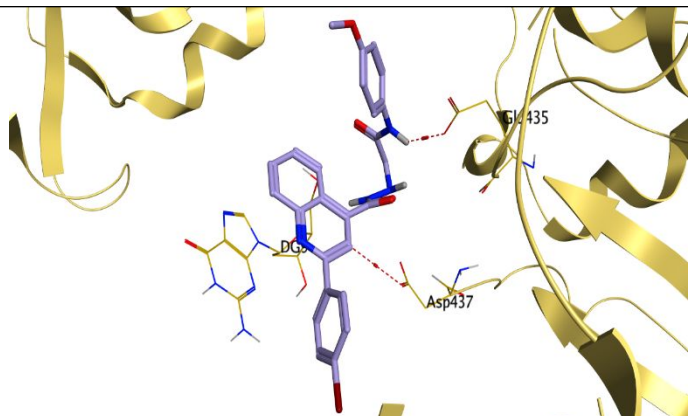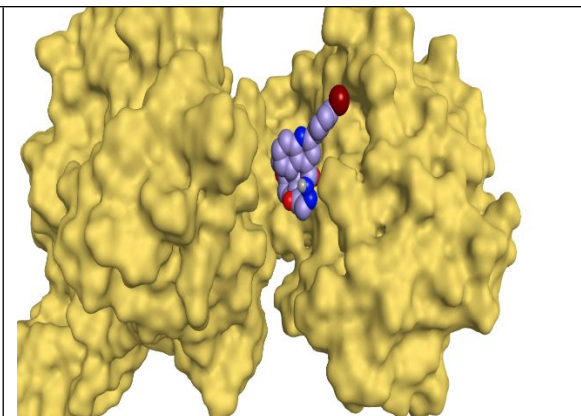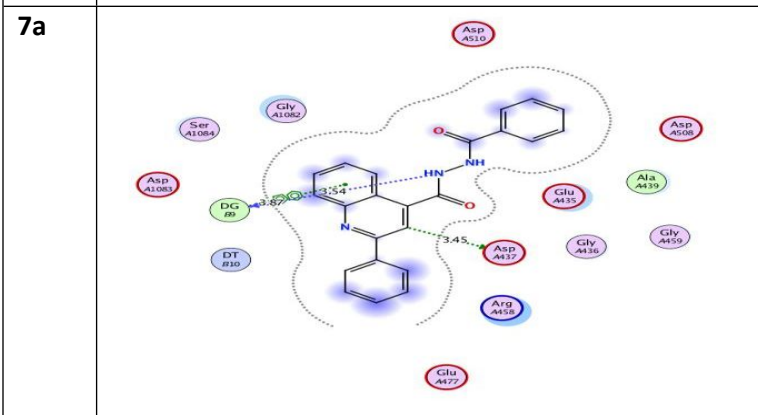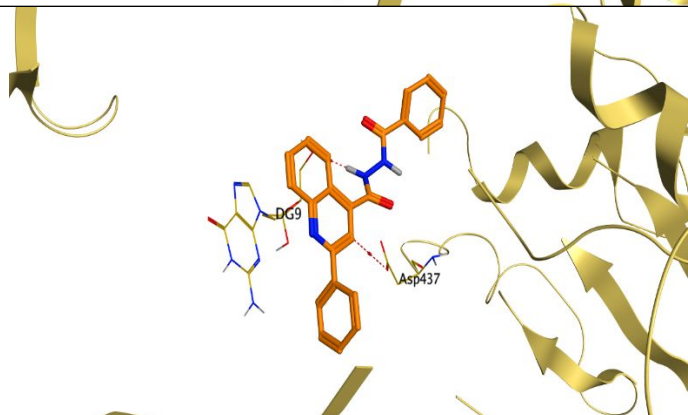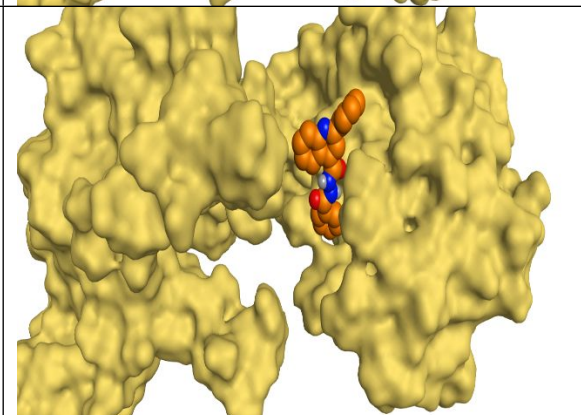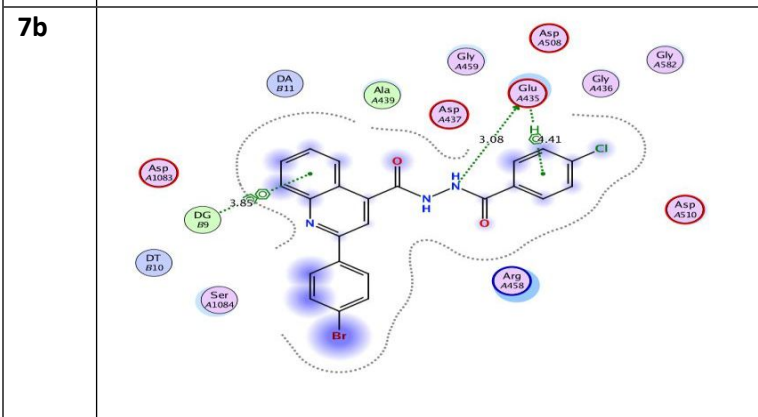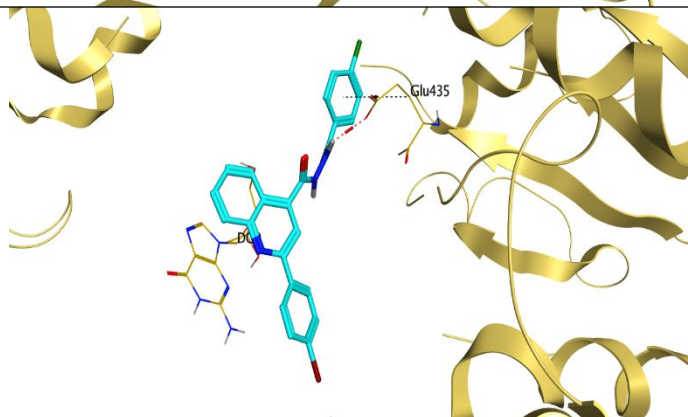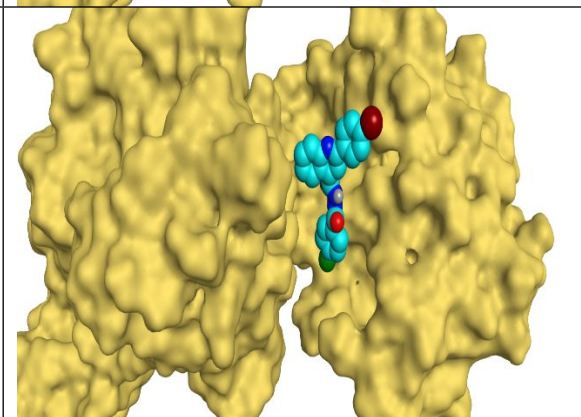

7c

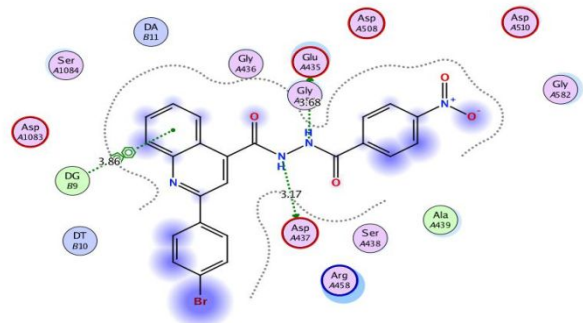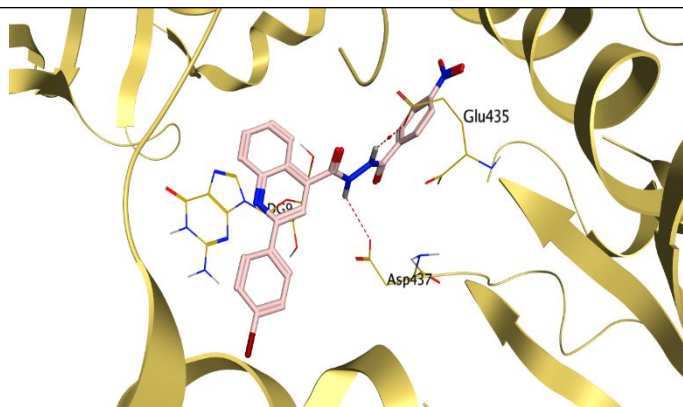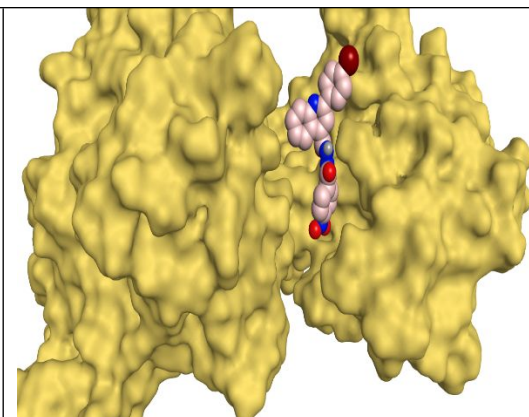

7d

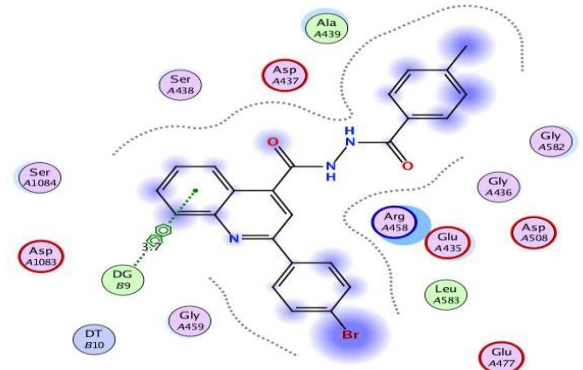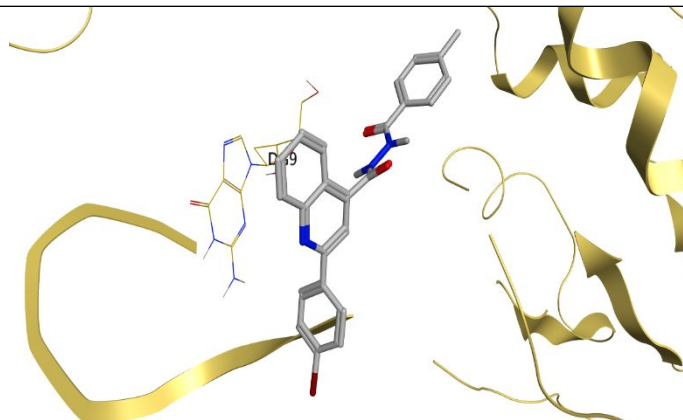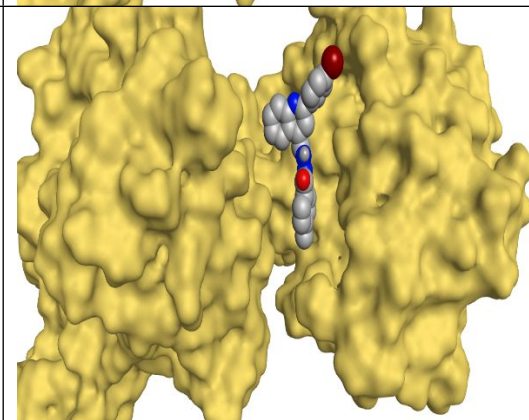

7e

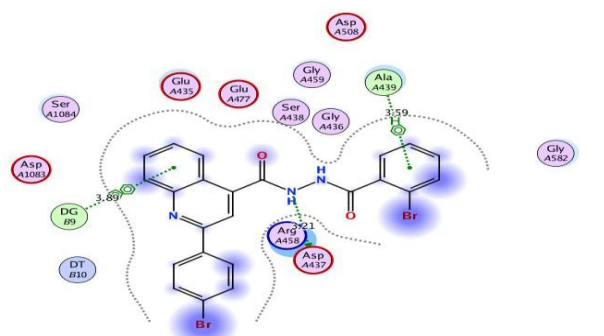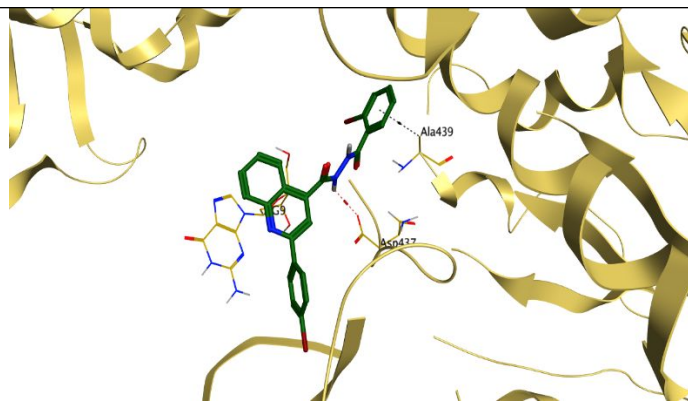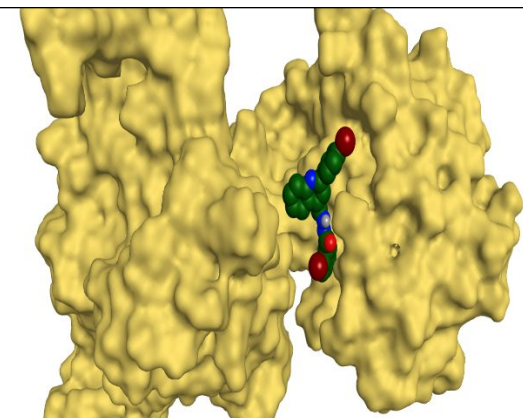

8

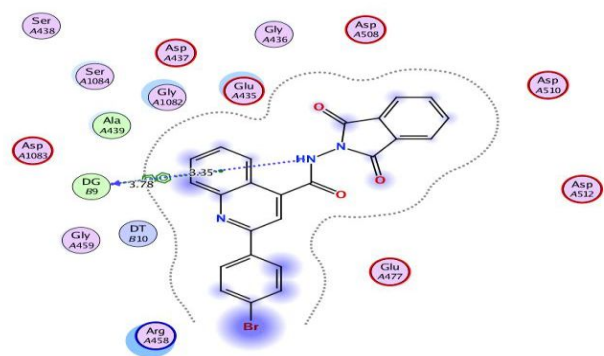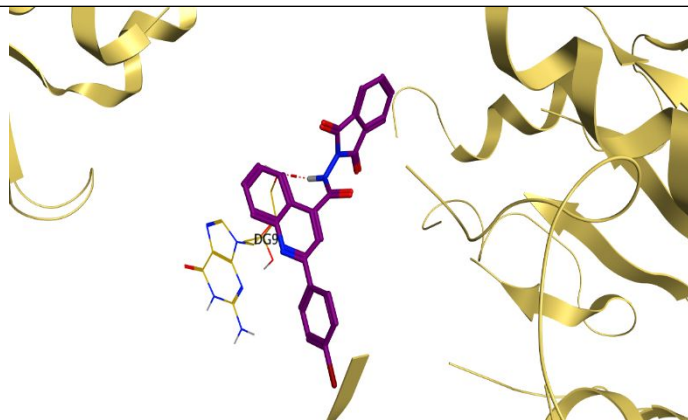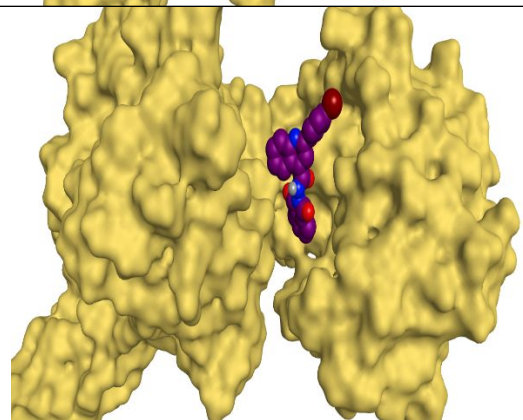

9

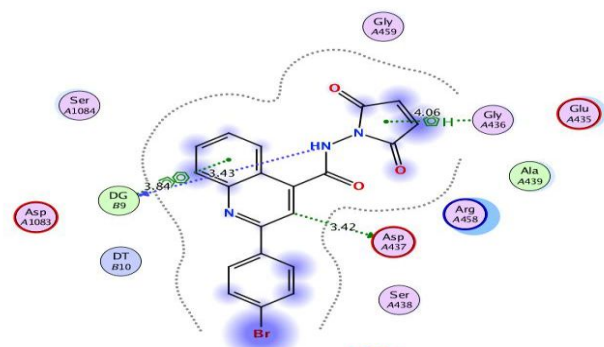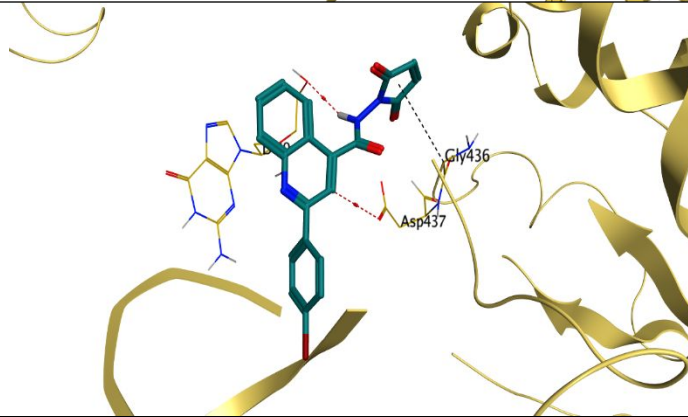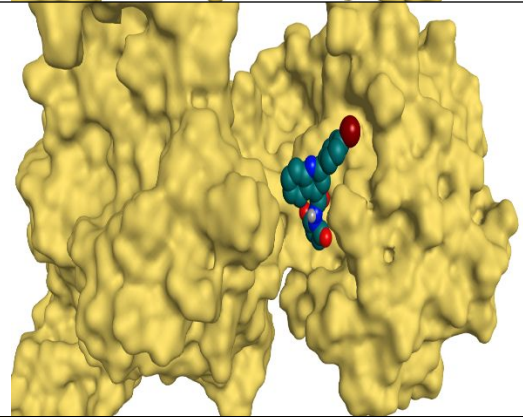

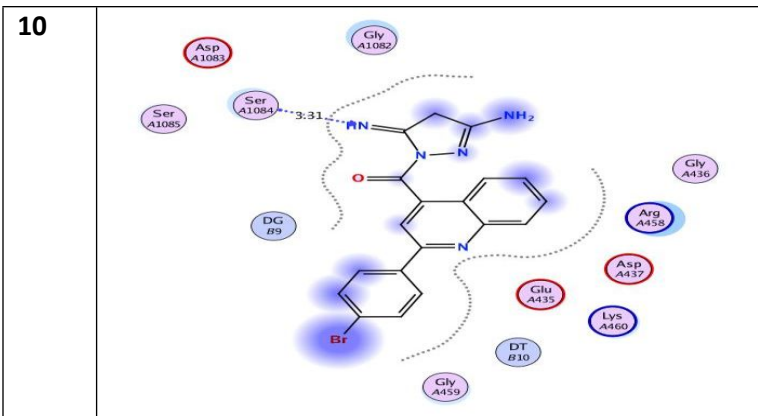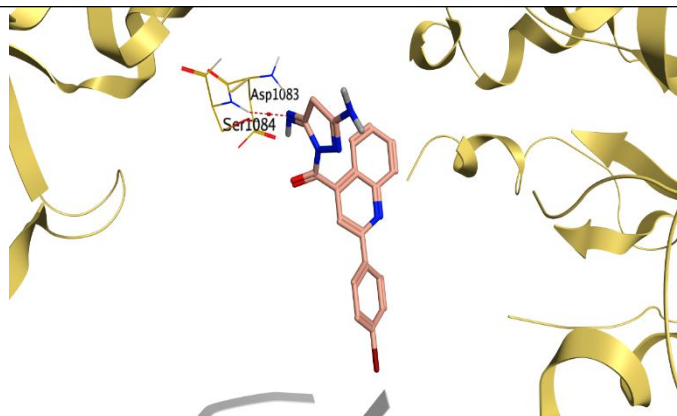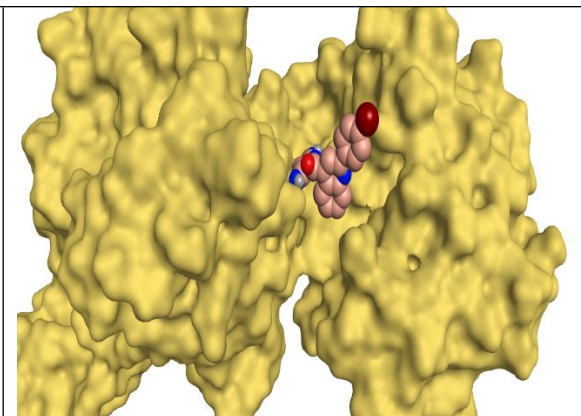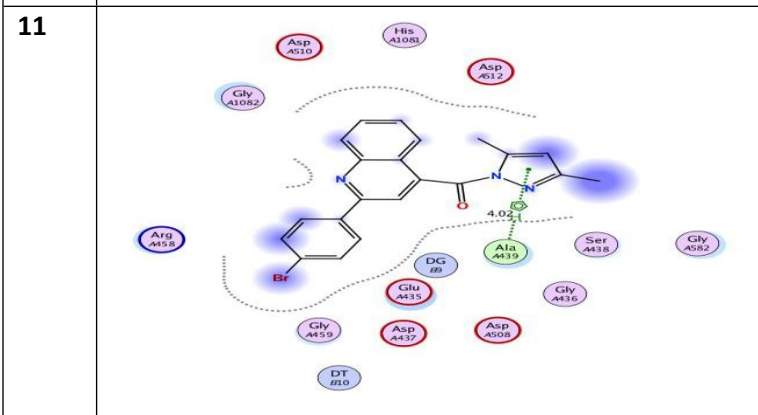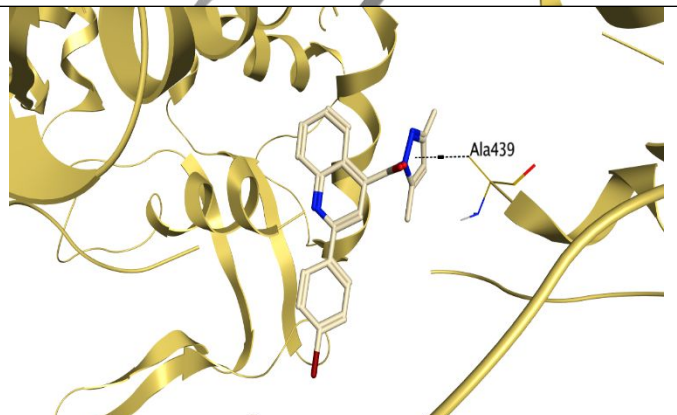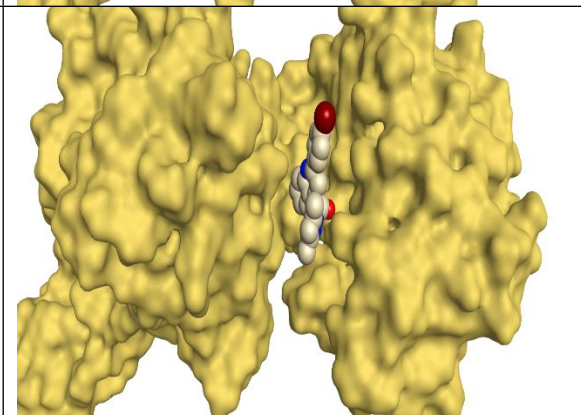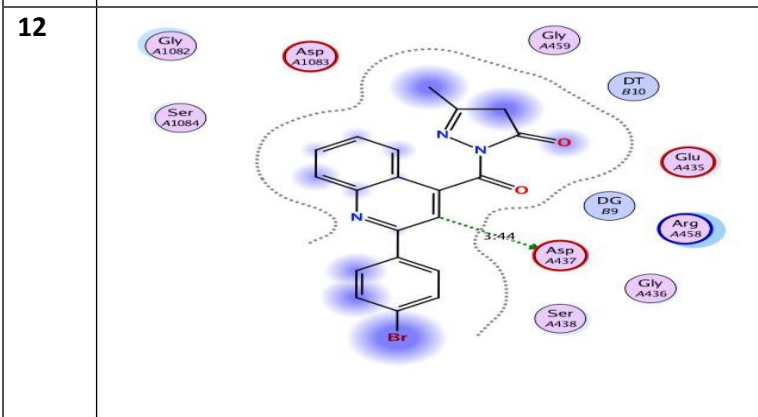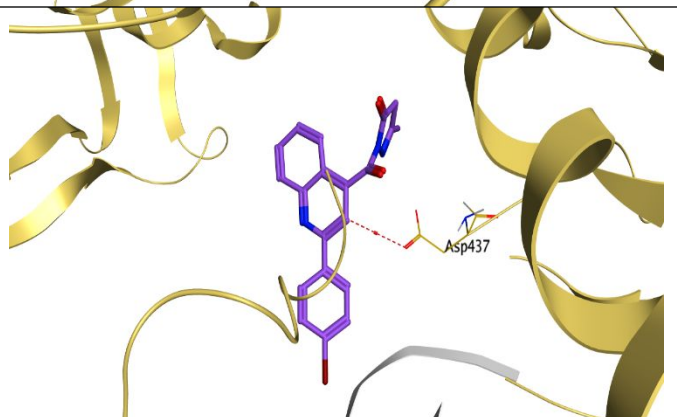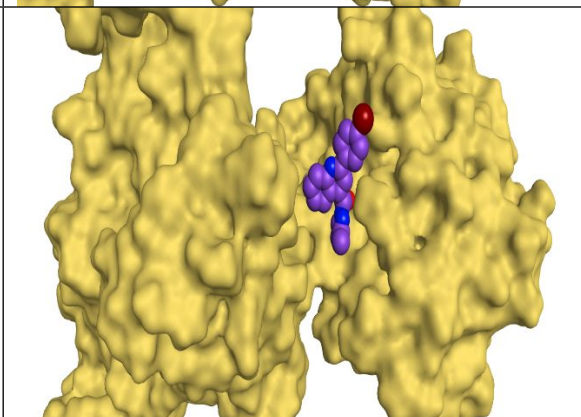

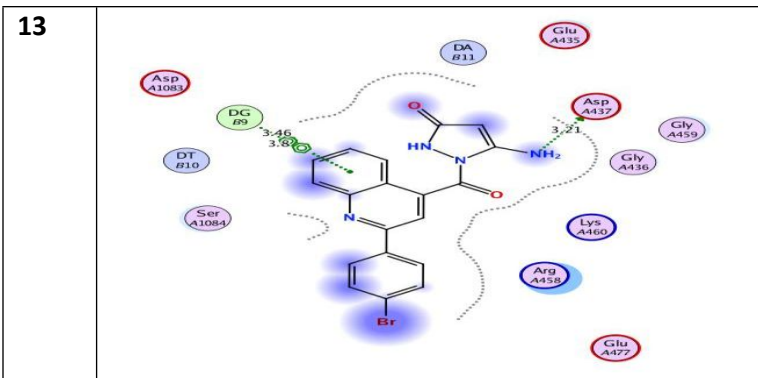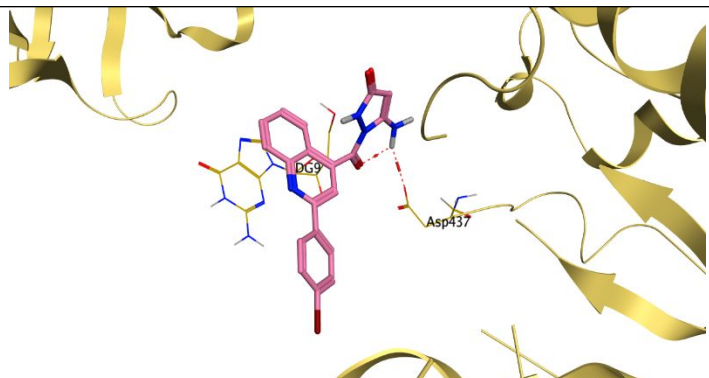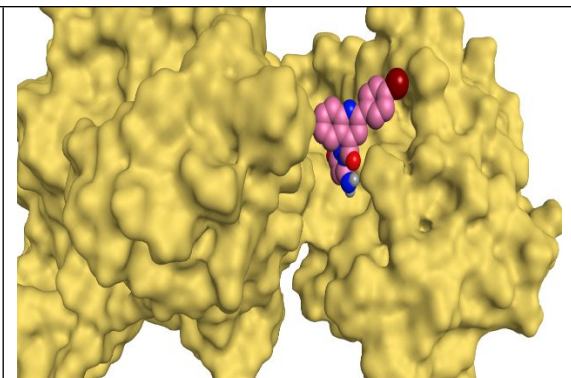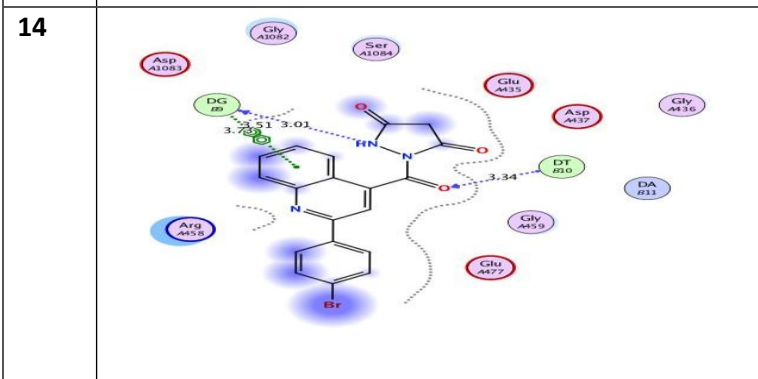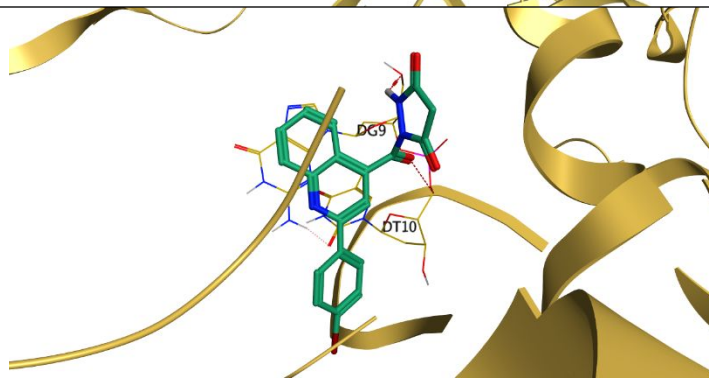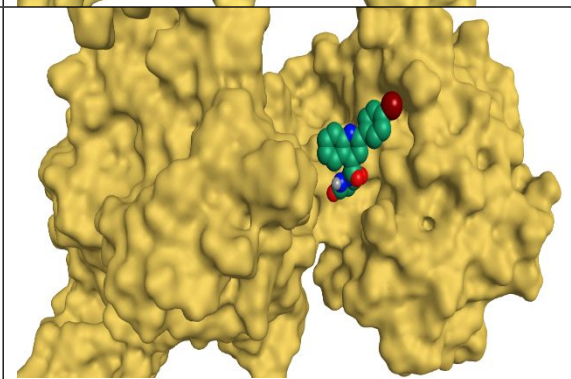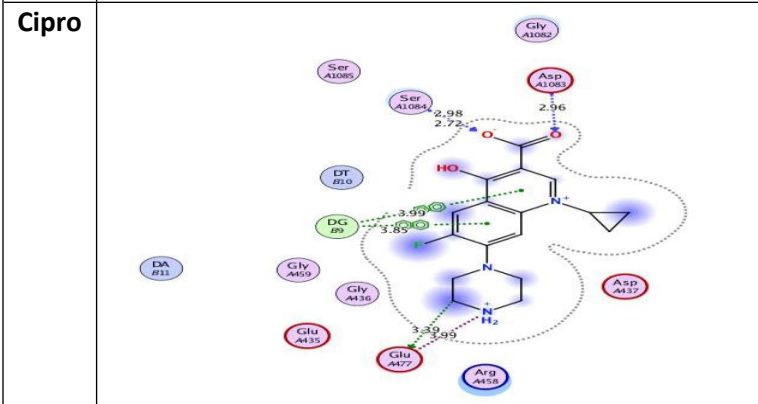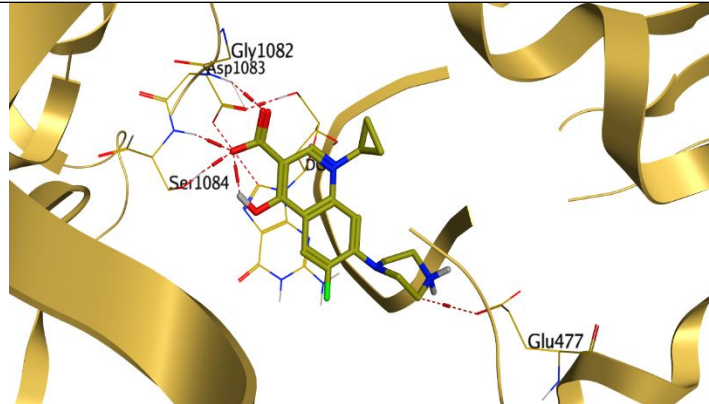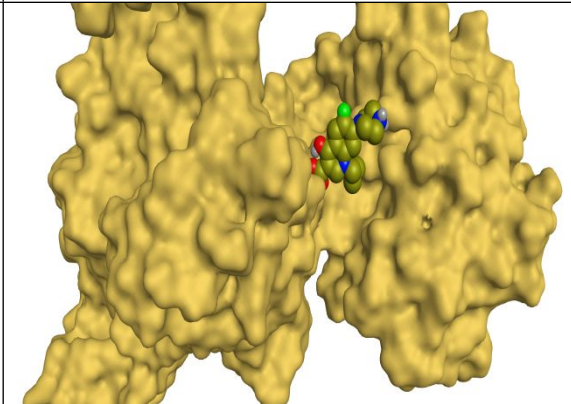



**Figure S2:** The 2D, and 3D binding interactions for the all afforded compounds (5-14) along with their corresponding 3D protein positioning

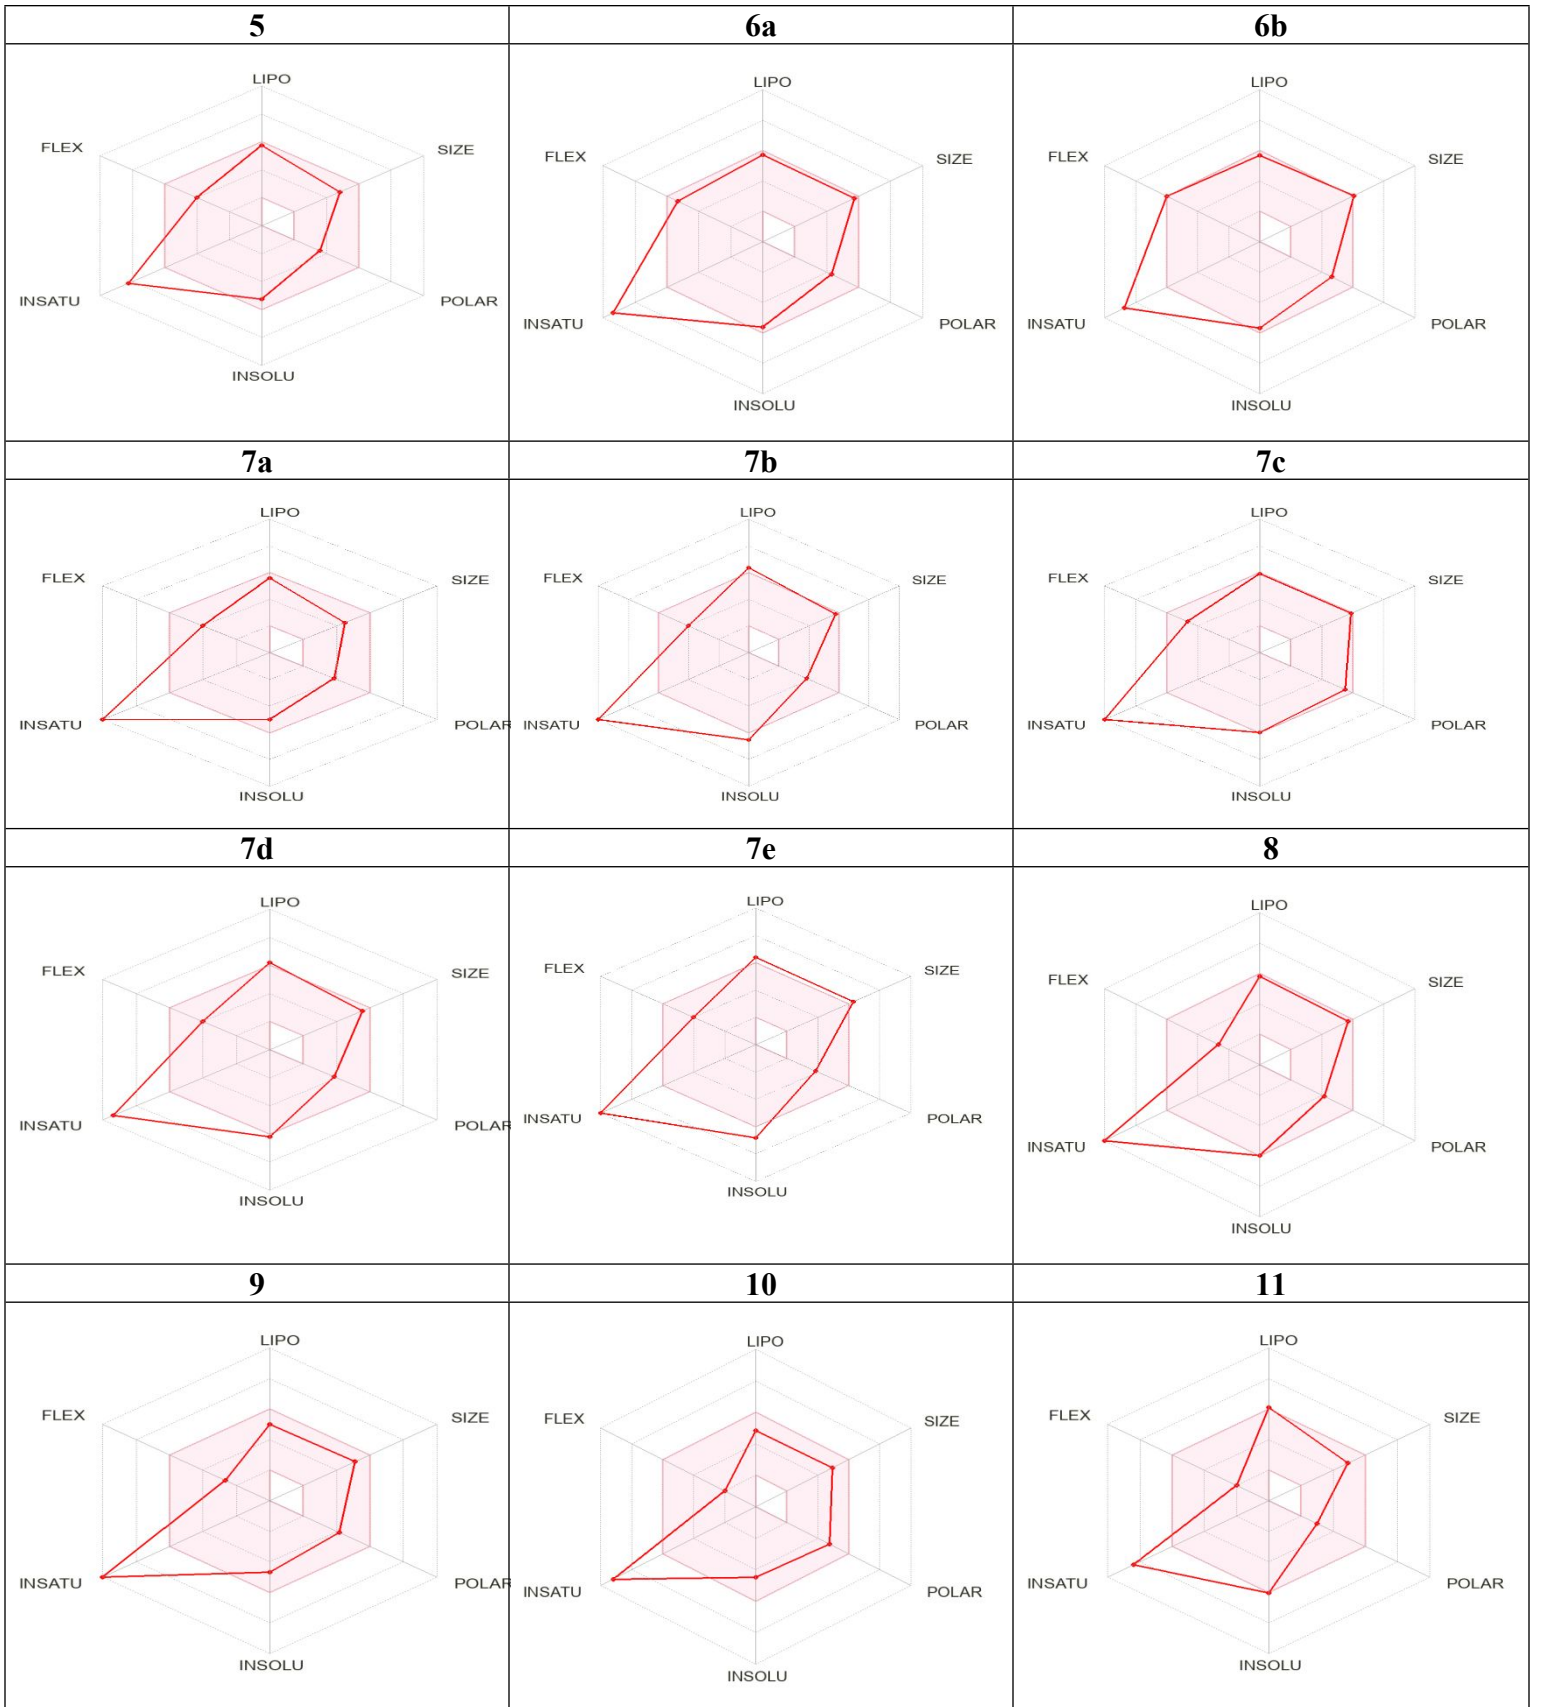

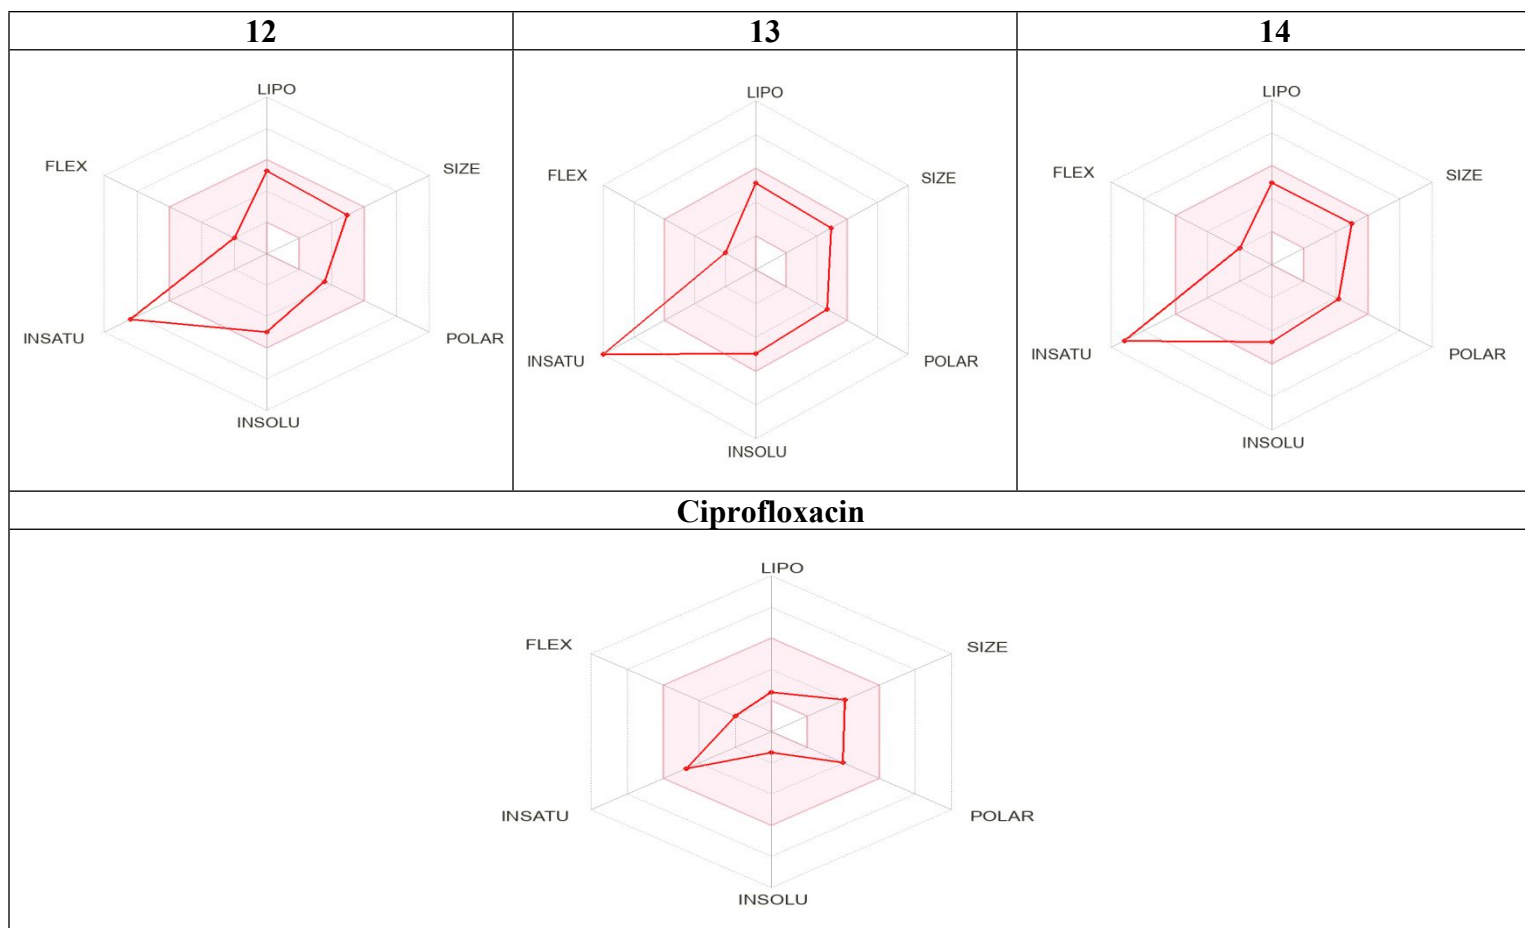

**Figure S3:** Radar bioavailability for studied compounds in which the area in pink displays specific property optimal range. (LIPO = lipophilicity expressed as XLOGP3 (range from -0.7 to 5.0). SIZE= size expressed as molecular weight (range from 150 g/mol to 500 g/mol). POLAR = polarity expressed as TPSA (topological polar surface area) (range from 20 Å<sup>2</sup> to 130 Å<sup>2</sup>). INSOLU = water insolubility by log S (ESOL) (range from -6 to 0). INSATU = insaturation expressed as for each carbons fraction in sp<sup>3</sup> hybridization (range from 0.25 to 1). FLEX = flexibility, expressed as number of rotatable bonds (range from 0 to 9).

## Part 2: Spectral data:

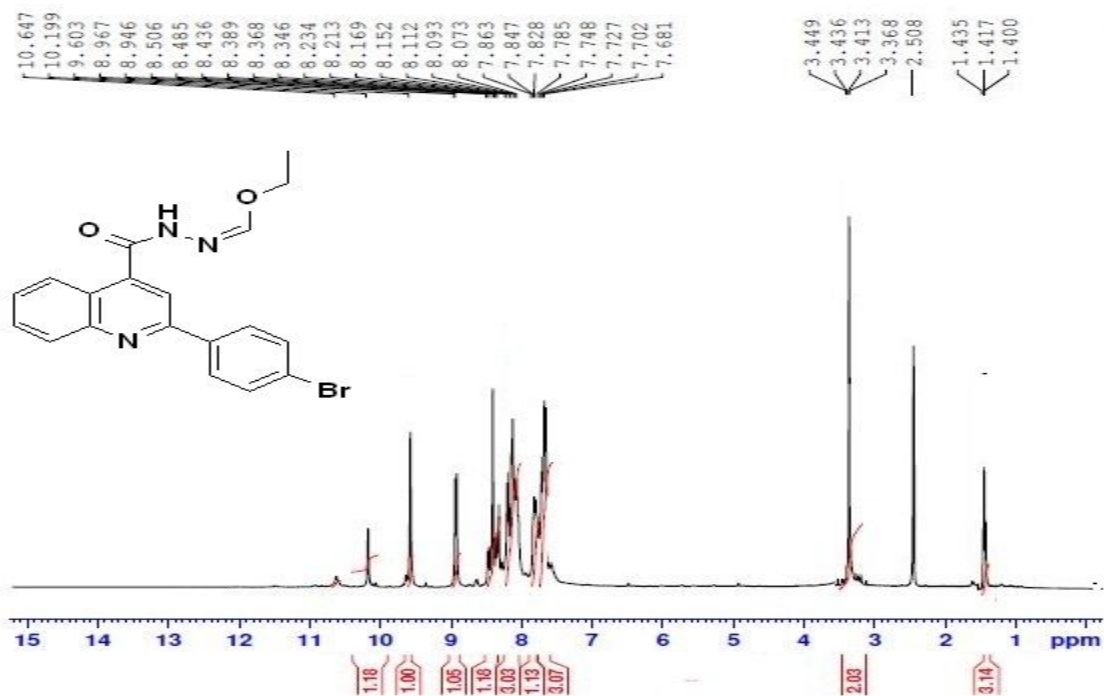

Figure S4: <sup>1</sup>H NMR spectrum of the compound 5.

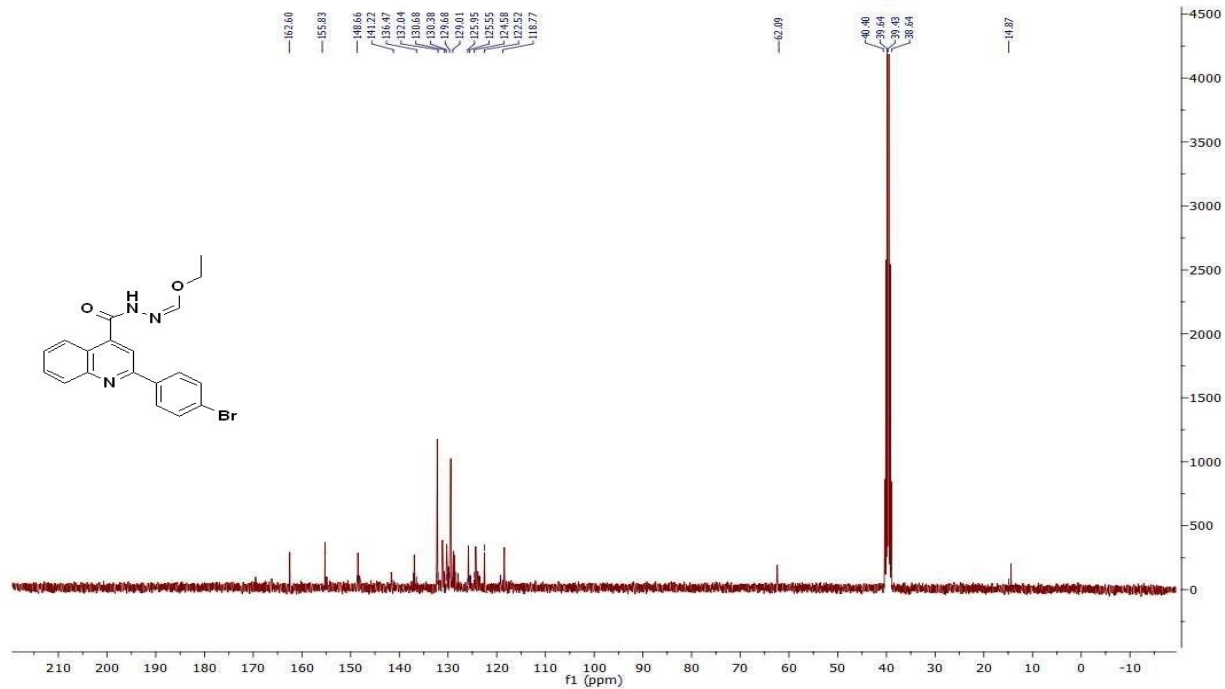

Figure S5: <sup>13</sup>C NMR spectrum of the compound 5.

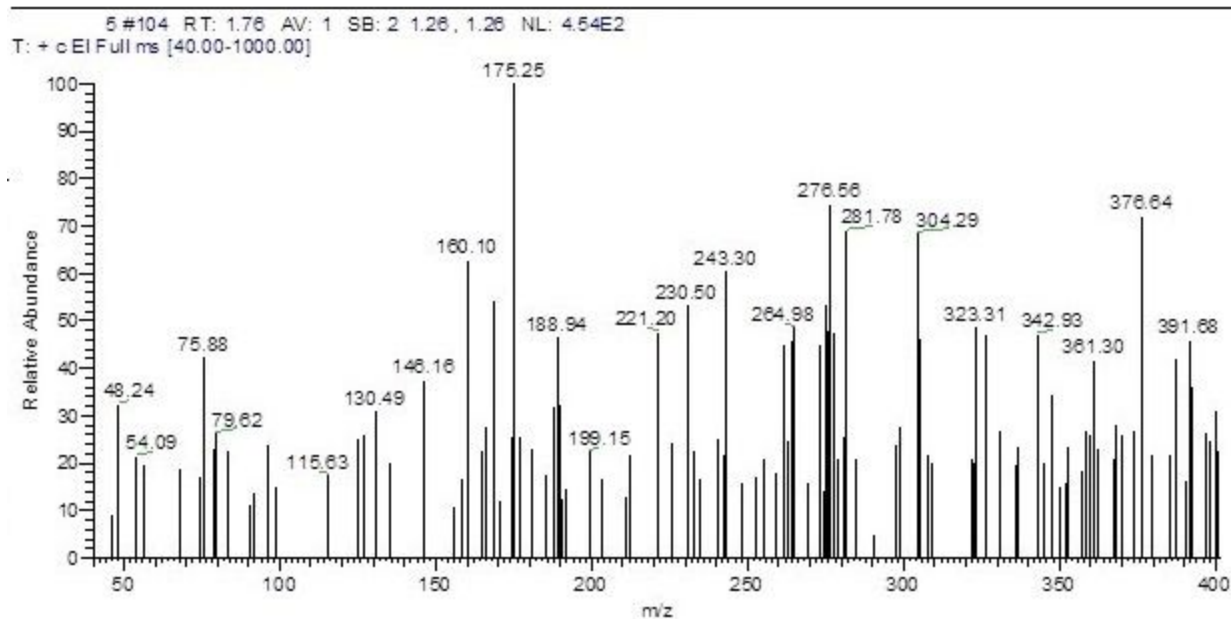

**Figure S6:** MS of the compound 5.

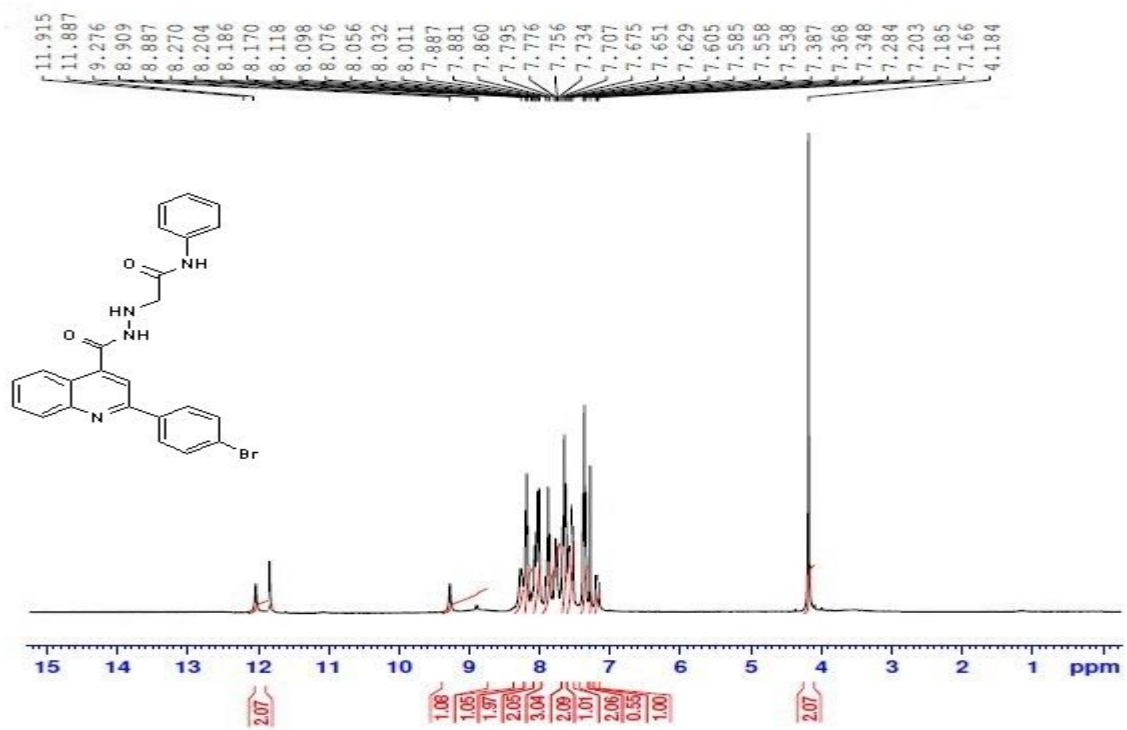

Figure S7: <sup>1</sup>H NMR spectrum of the compound 6a.

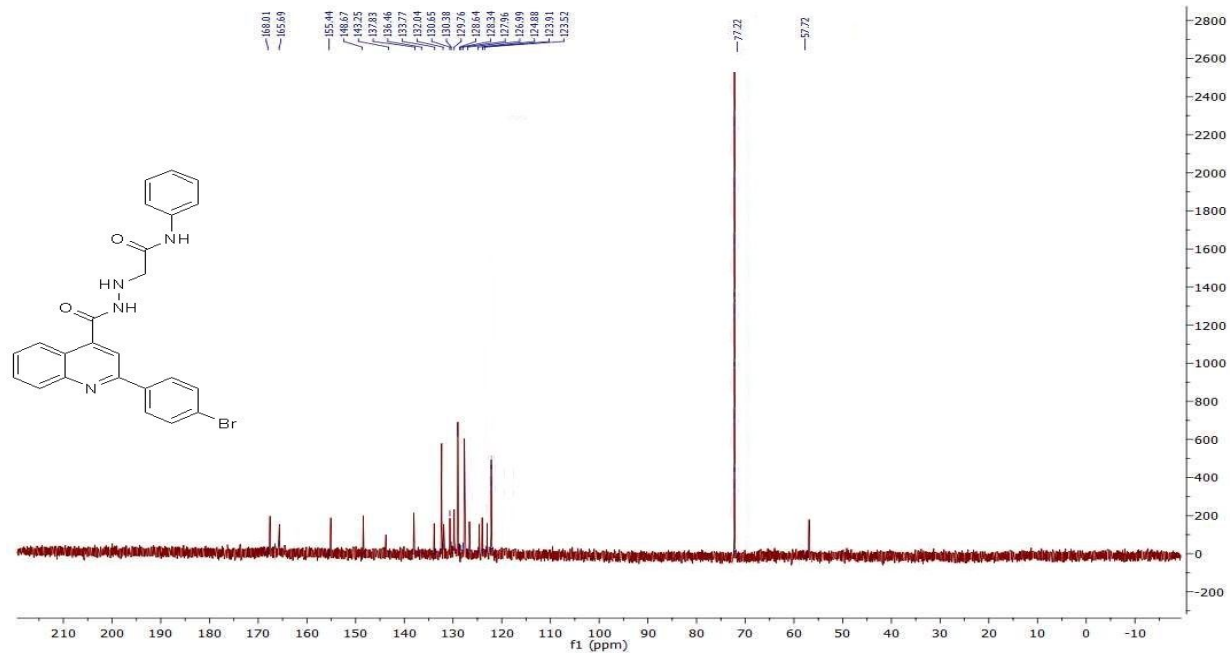

Figure S8: <sup>13</sup>C NMR spectrum of the compound 6a.



6a\_20220731125137 #55-67 RT: 0.94-1.14 AV: 13 SB: 6 2.79, 2.48-2.54 NL: 7.06E1  
T: + c EI Full ms [40.00-1000.00]

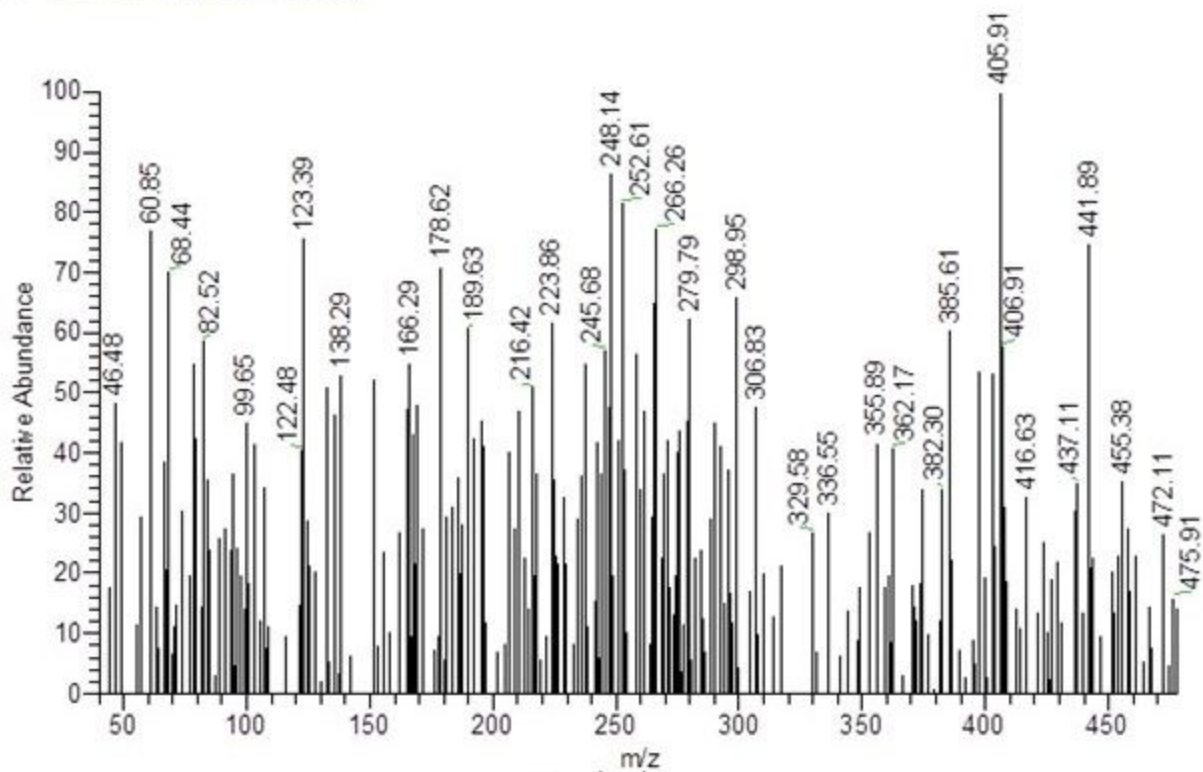

Figure S9: MS of the compound 6a.

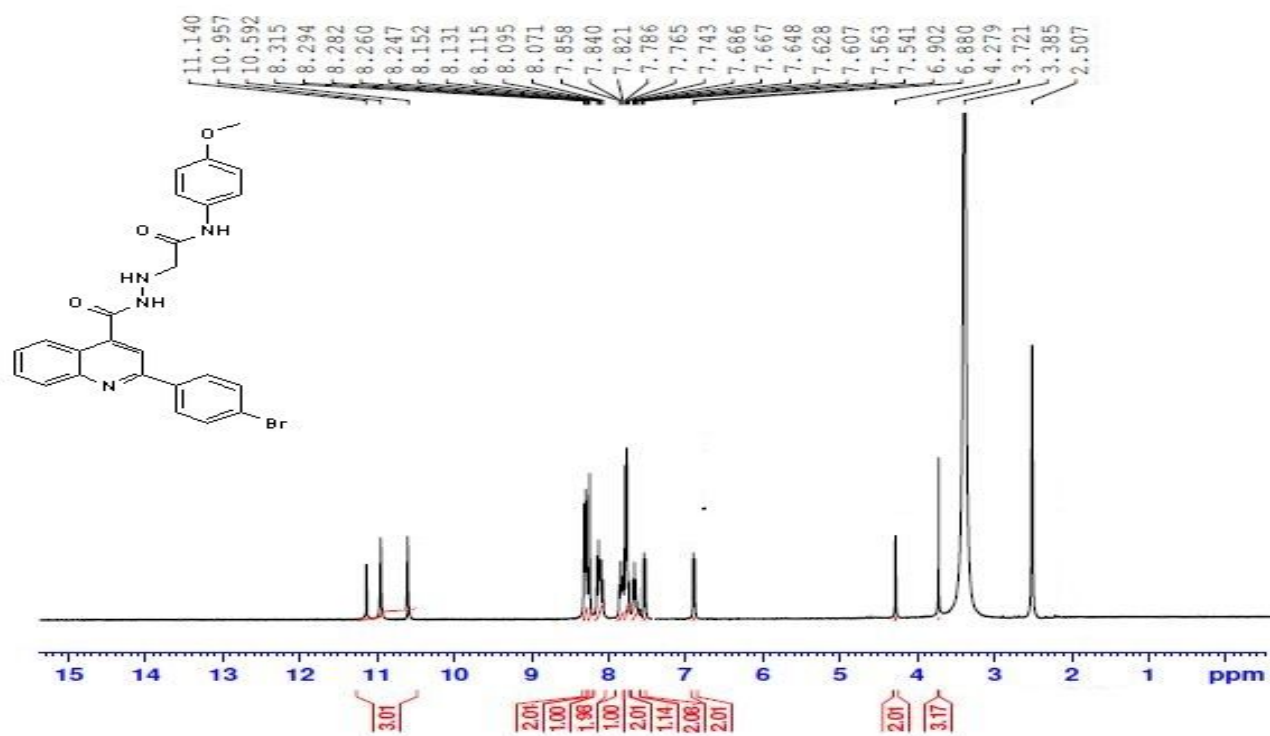

Figure S10: <sup>1</sup>H NMR spectrum of the compound 6b.

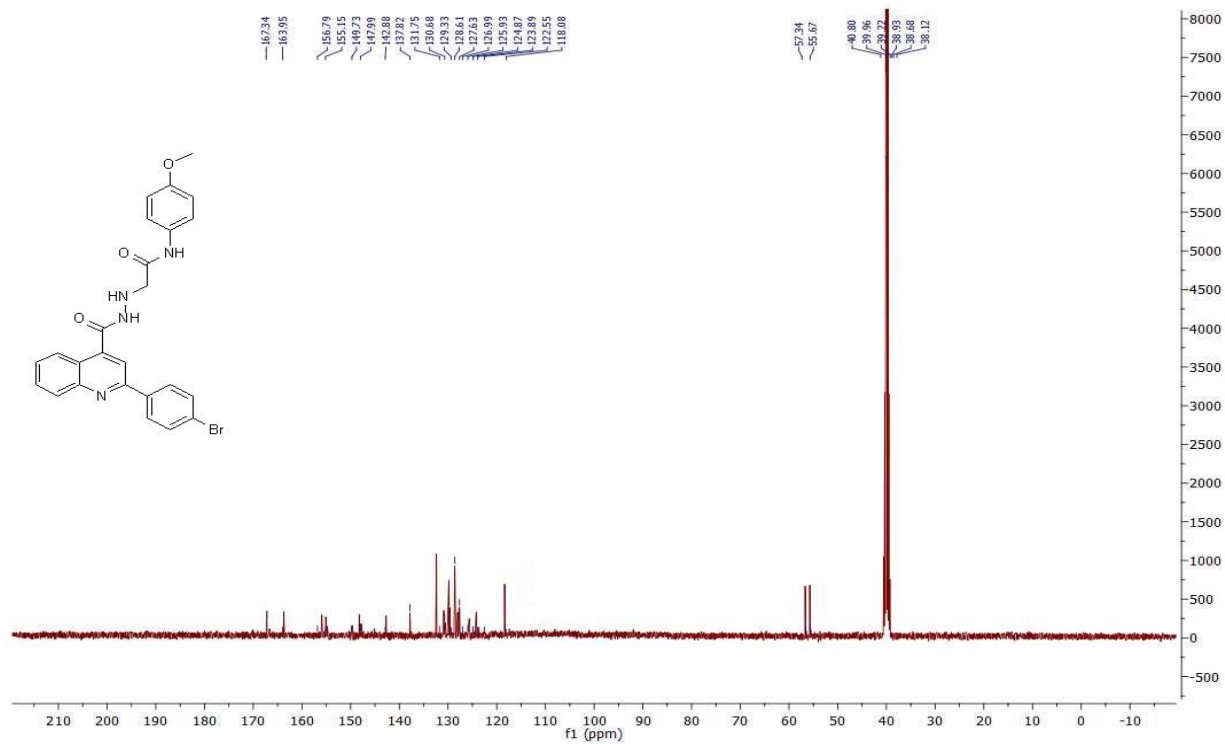

**Figure S11:**  $^{13}\text{C}$  NMR spectrum of the compound **6b**.

6b #80-94 RT: 1.36-1.59 AV: 15 SB: 6 2.79 , 2.48-2.54 NL: 2.83E1  
T: + c EI Full ms [40.00-1000.00]

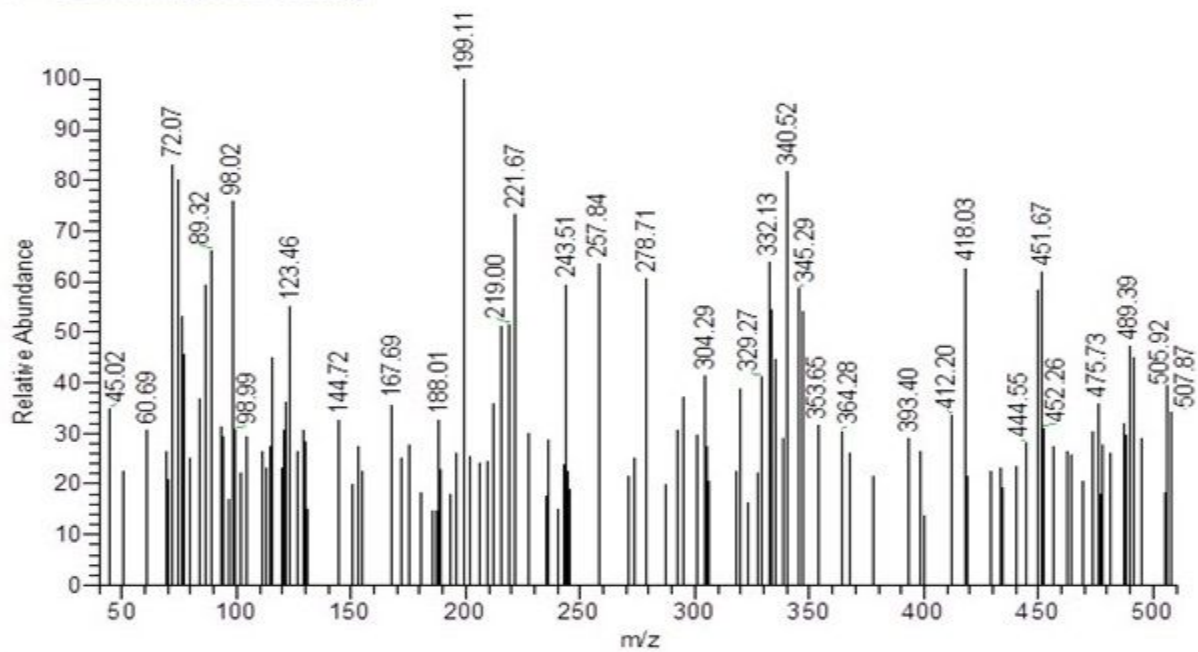

Figure S12: MS of the compound 6b.

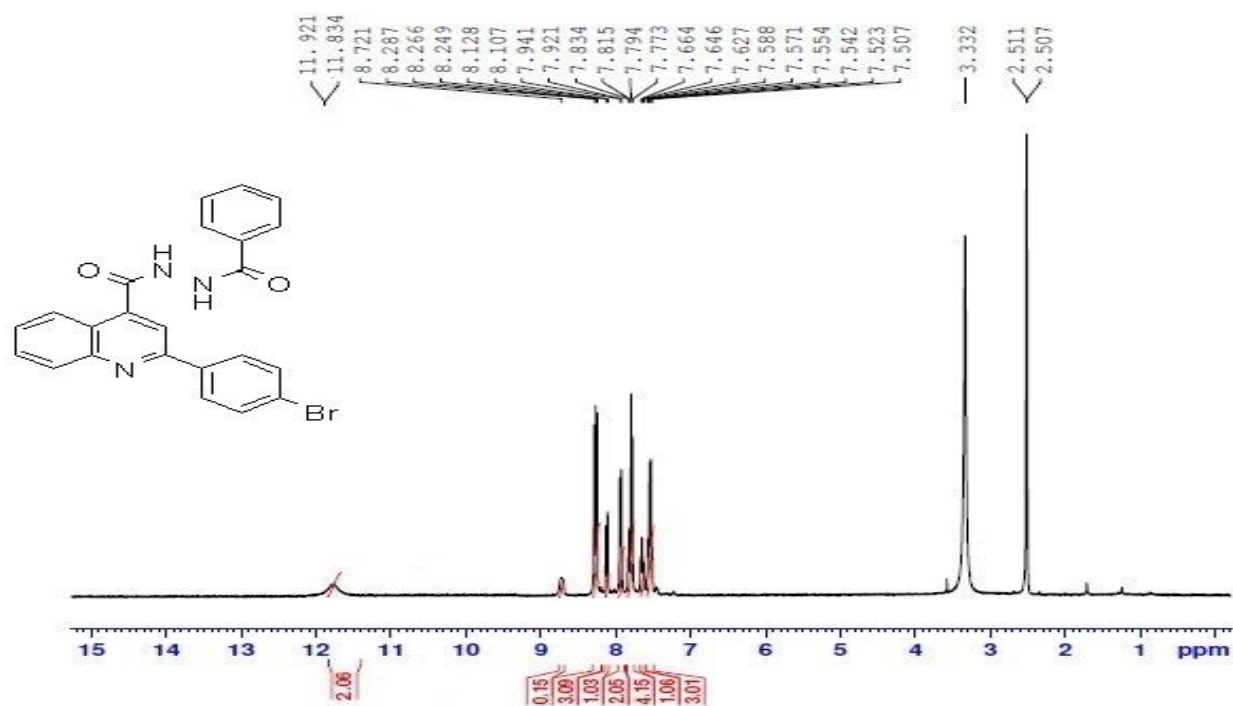

Figure S13: <sup>1</sup>H NMR spectrum of the compound 7a.

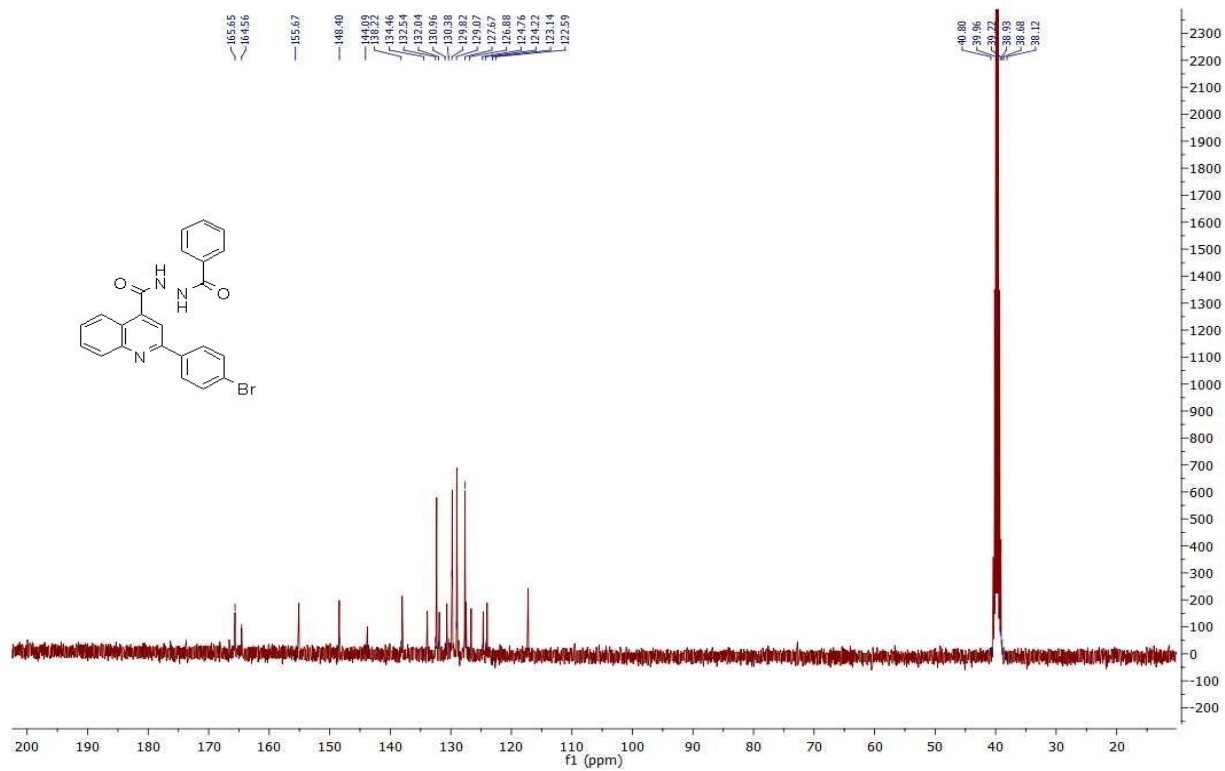

Figure S14:  $^{13}\text{C}$  NMR spectrum of the compound 7a.

7a #55 RT: 0.94 AV: 1 SB: 6 2.79 , 2.48-2.54 NL: 2.18E2  
T: + c EI Full ms [40.00-1000.00]

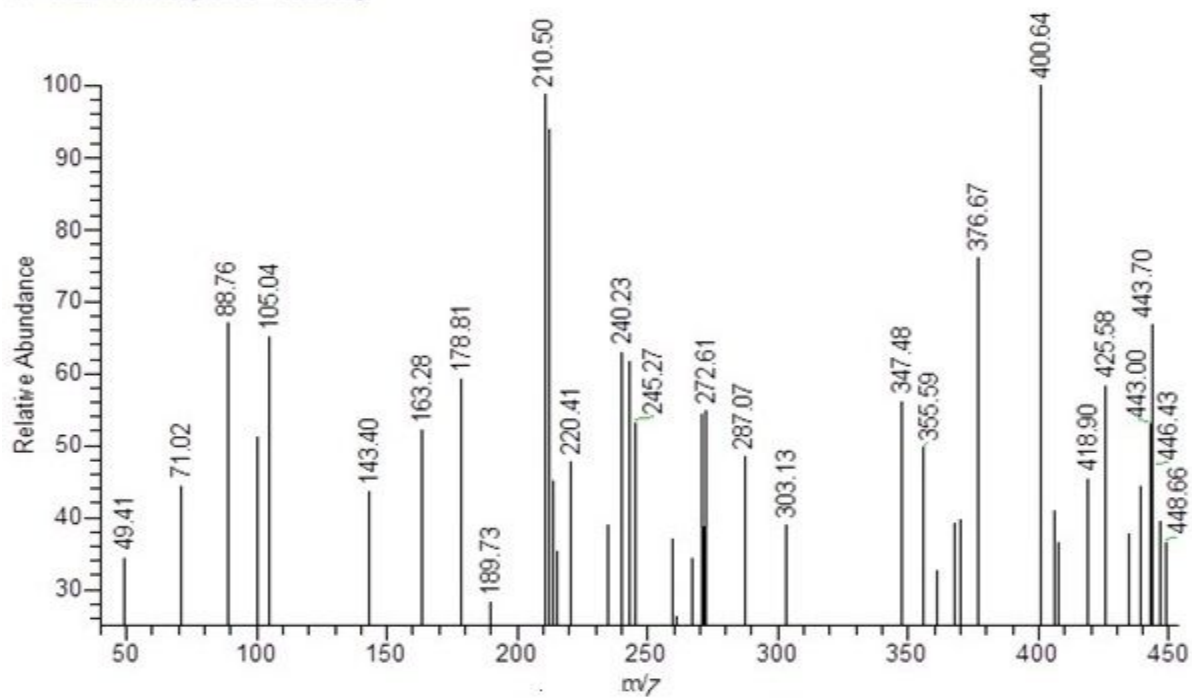

Figure S15: MS of the compound 7a.

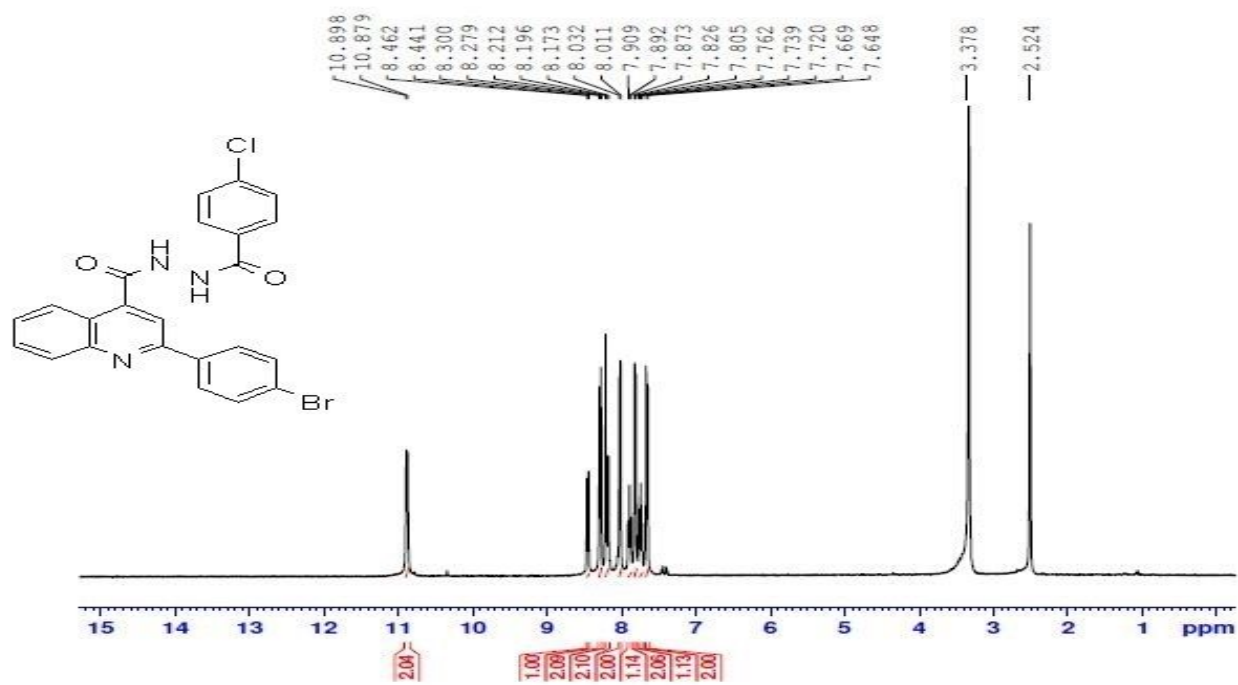

Figure S16: <sup>1</sup>H NMR spectrum of the compounds 7b.



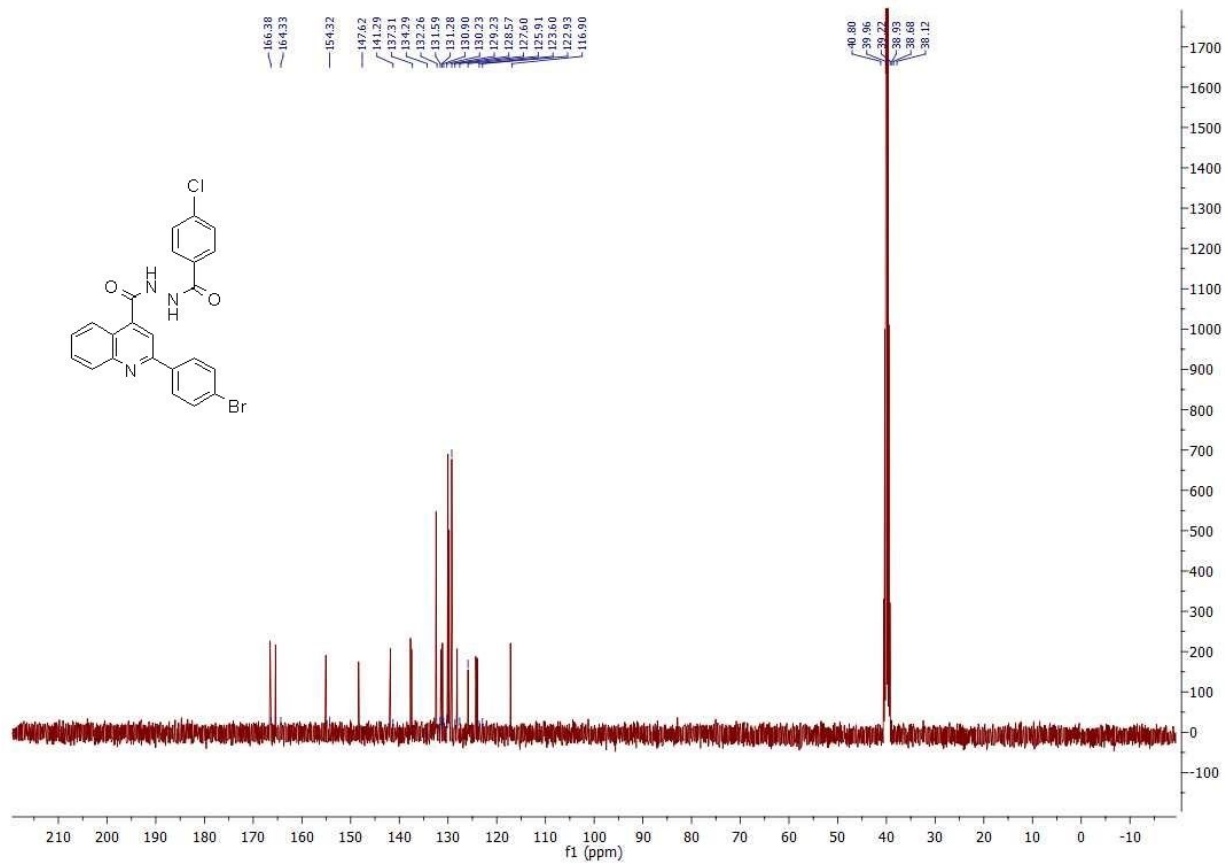

Figure S17:  $^{13}\text{C}$  NMR spectrum of the compound 7b.

7b\_20220731123118#119 RT: 2.01 AV: 1 SB: 6 2.79, 2.48-2.54 NL: 3.57E2  
T: + c EI Full ms [40.00-1000.00]

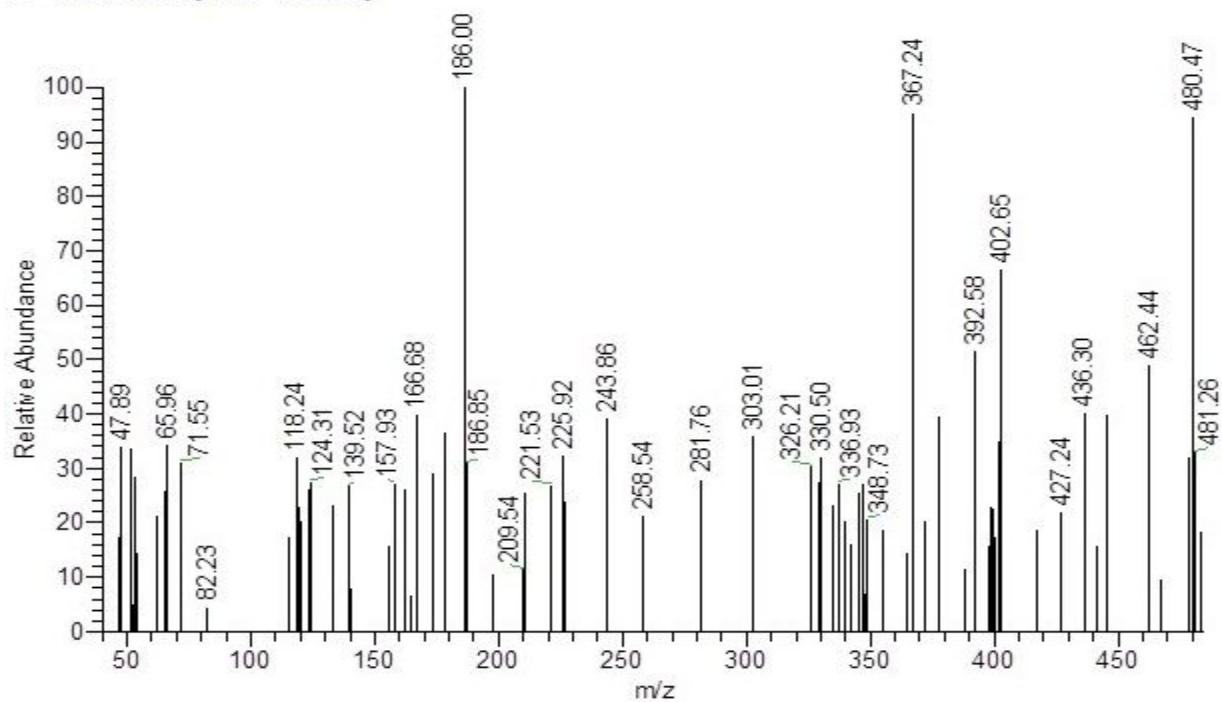

Figure S18: MS of the compound 7b.

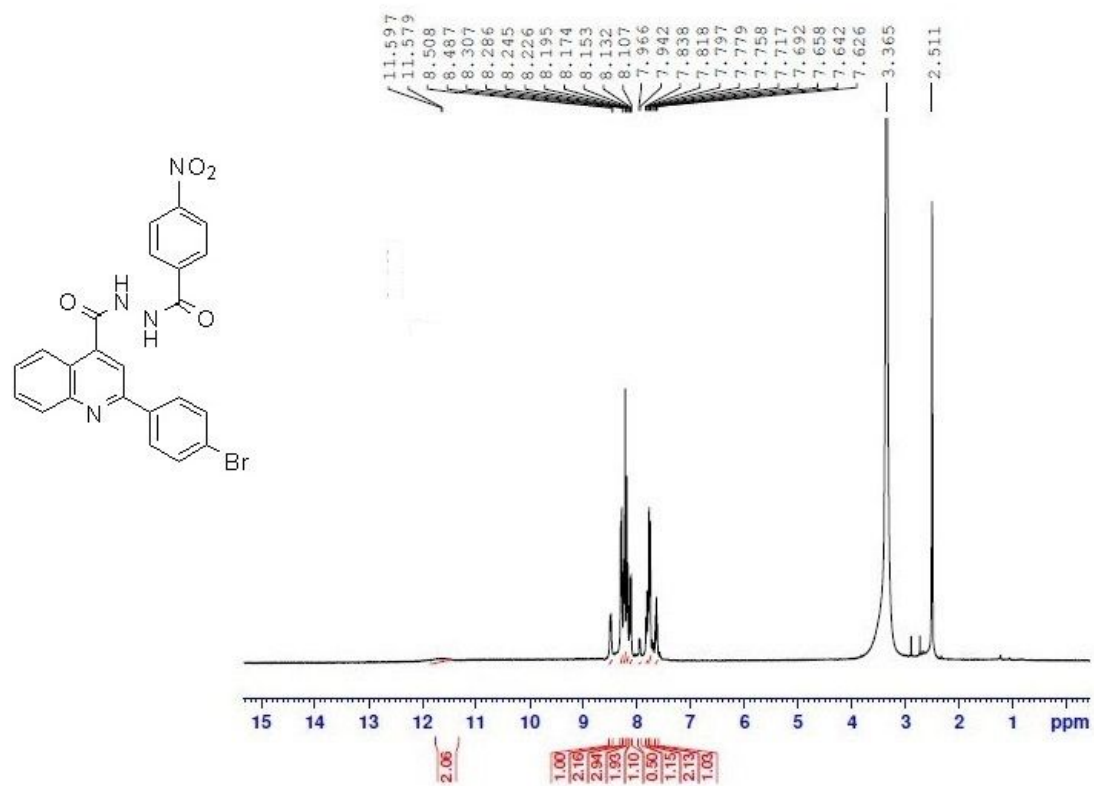

**Figure S19:** <sup>1</sup>H NMR spectrum of the compound 7c.

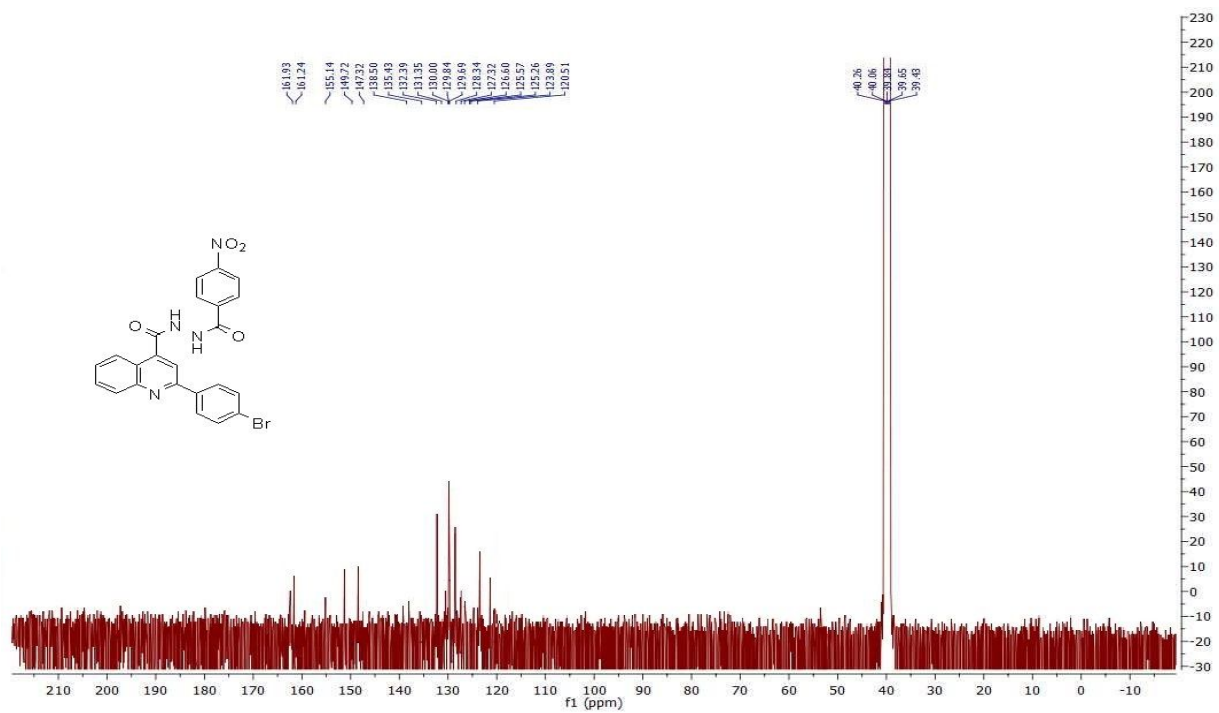

Figure S20: <sup>13</sup>C NMR spectrum of the compound 7c.

7c\_20220731134521 #202-204 RT: 3.40-3.43 AV: 3 SB: 6 2.79, 2.48-2.54 NL: 1.80E2  
T: + c EI Full ms [40.00-1000.00]

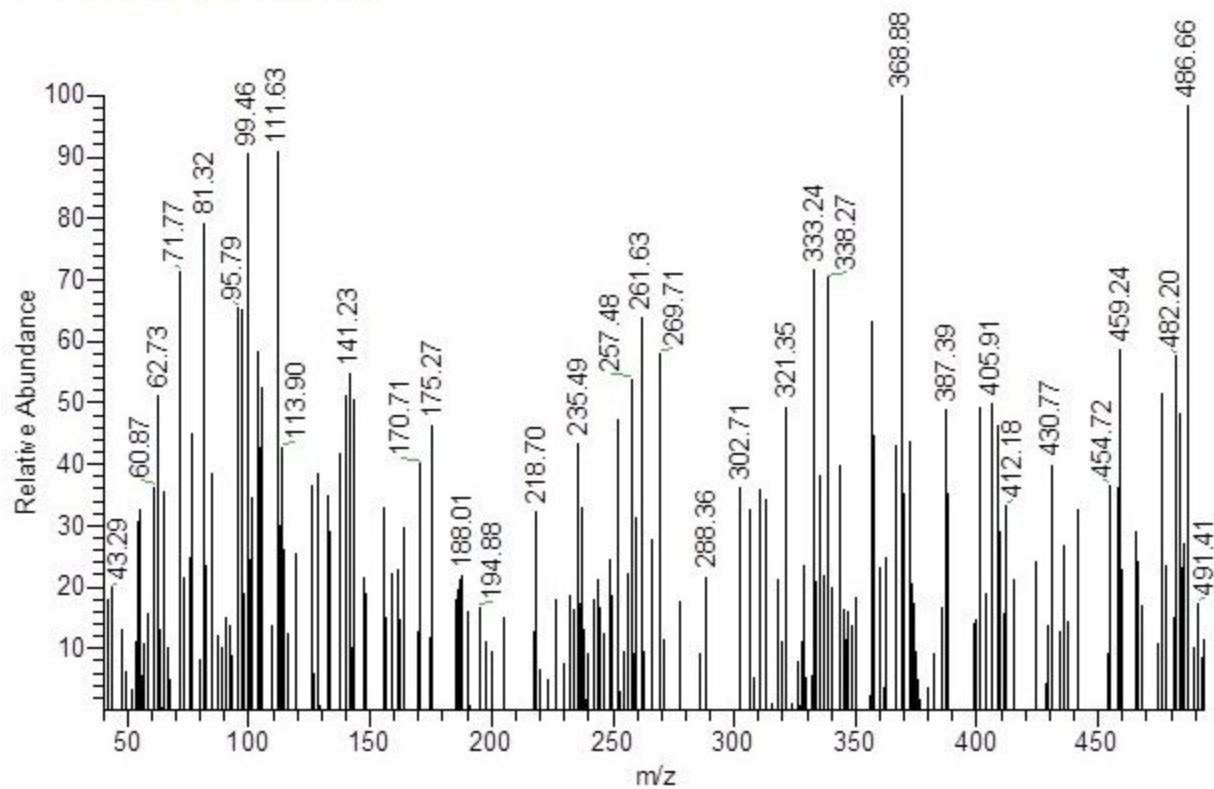

Figure S21: MS of the compound 7c.

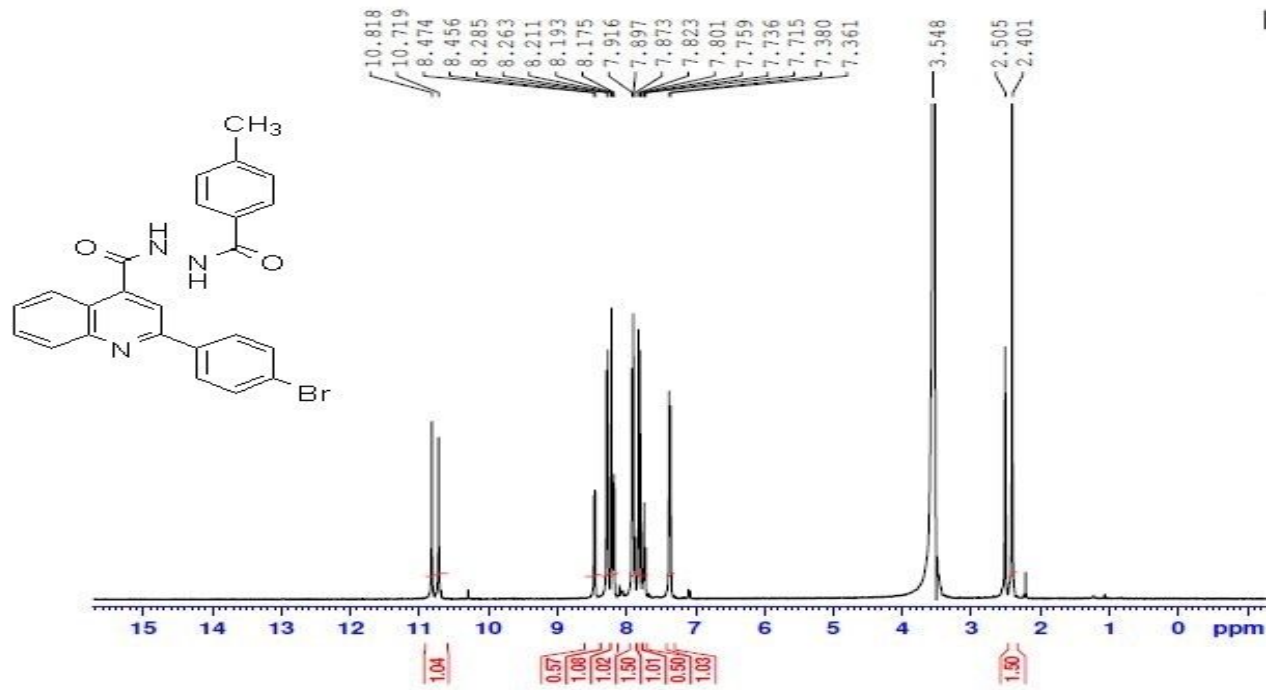

Figure S22: <sup>1</sup>H NMR spectrum of the compound 7d.

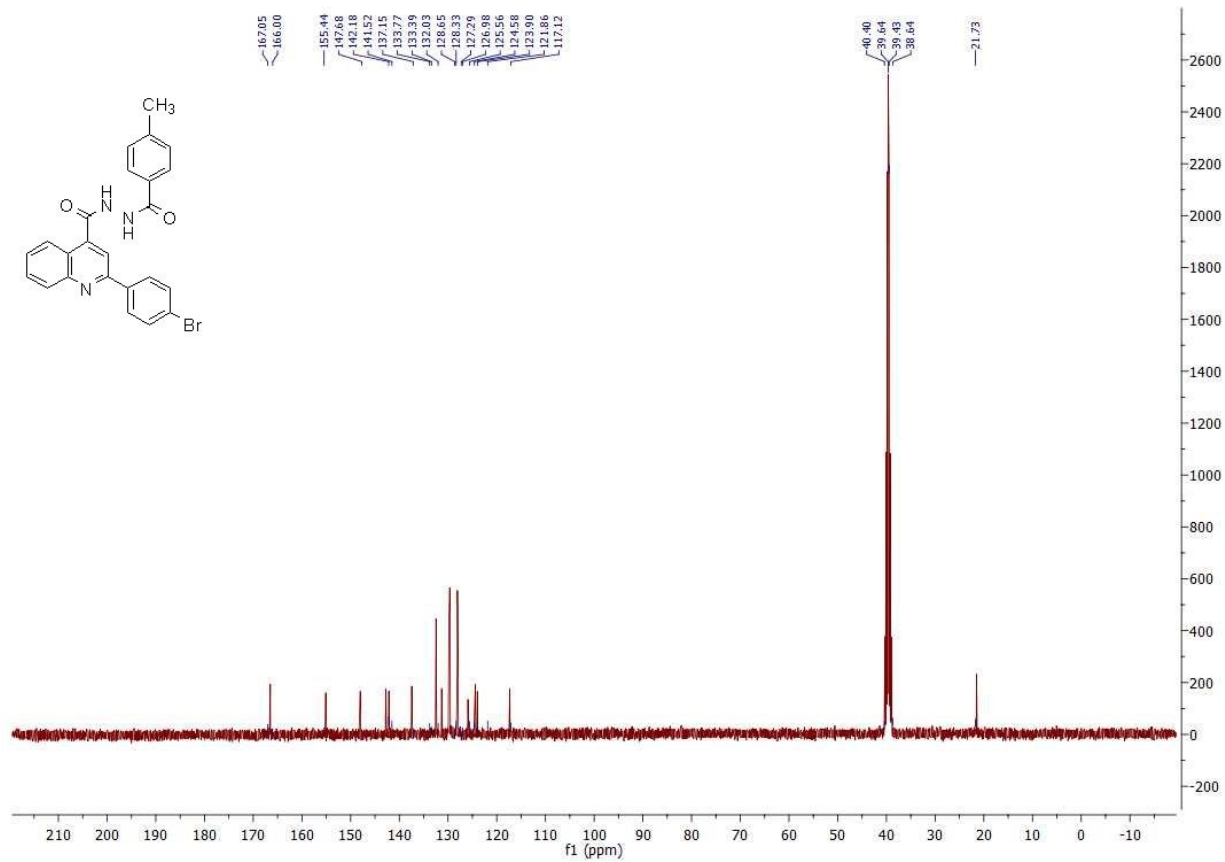

Figure S23:  $^{13}\text{C}$  NMR spectrum of the compound 7d.

7d\_20220731135412 #165 RT: 2.78 AV: 1 SB: 6 2.79 , 2.48-2.54 NL: 7.80E2  
T: + c EI Full ms [40.00-1000.00]

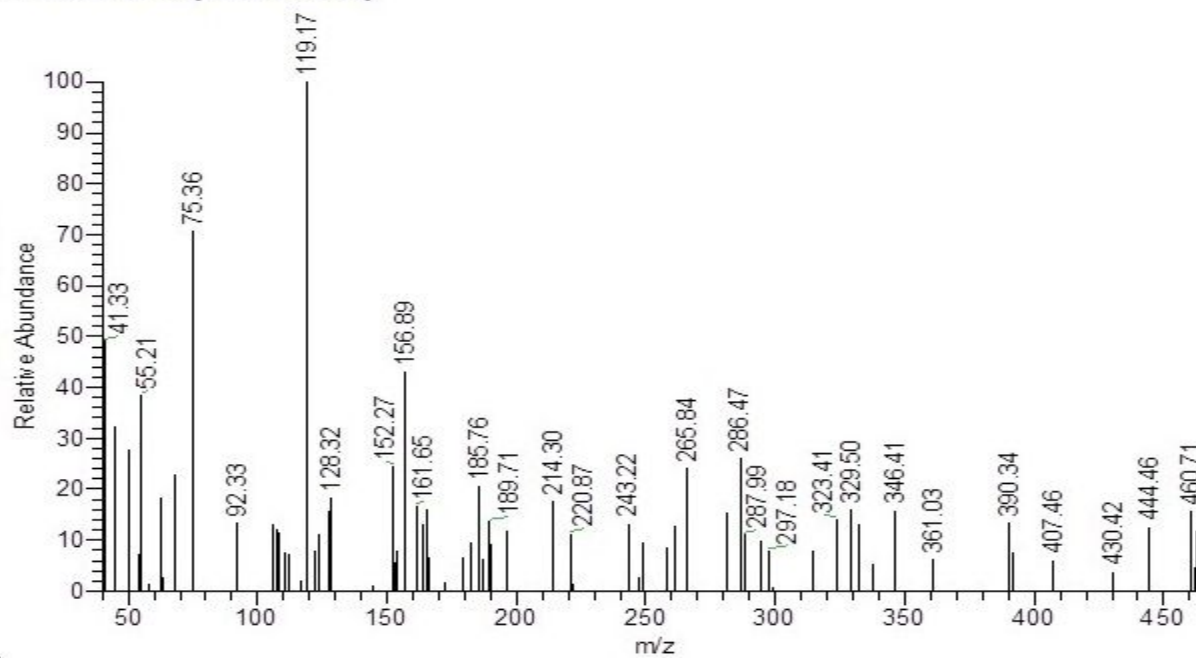

Figure S24: MS of the compound 7d.



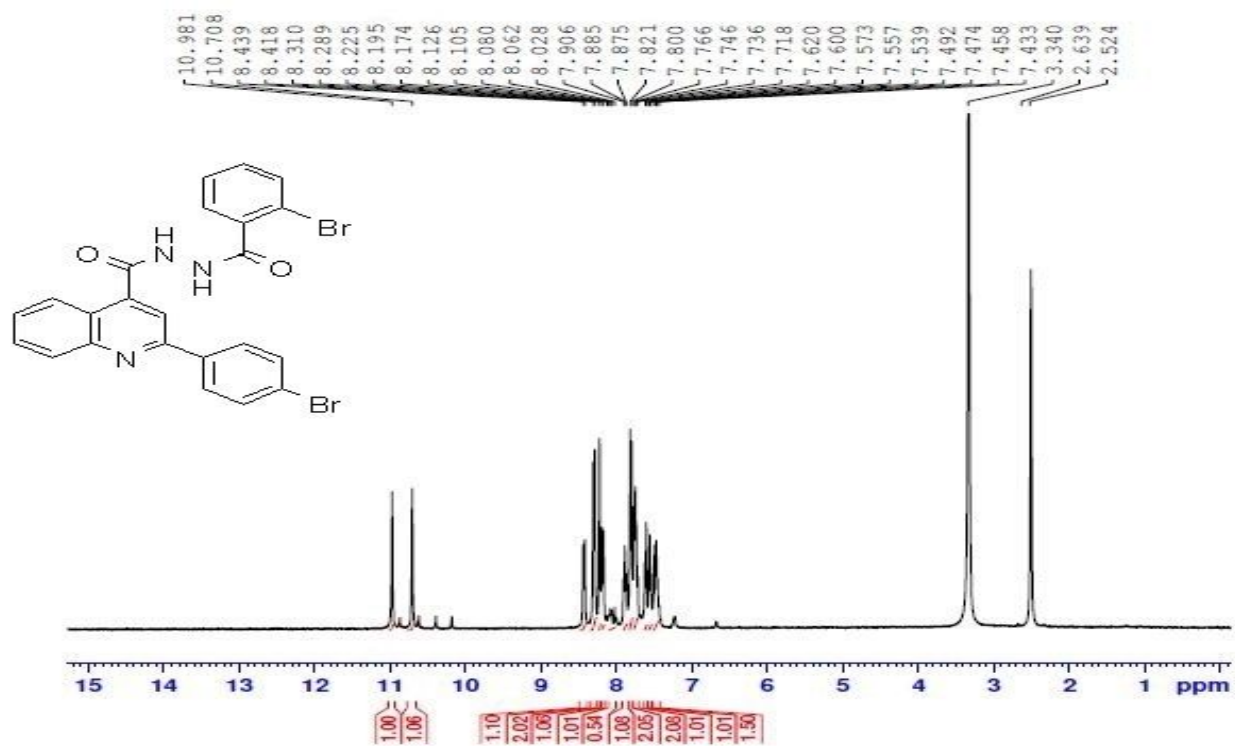

Figure S25: <sup>1</sup>H NMR spectrum of the compound 7e.

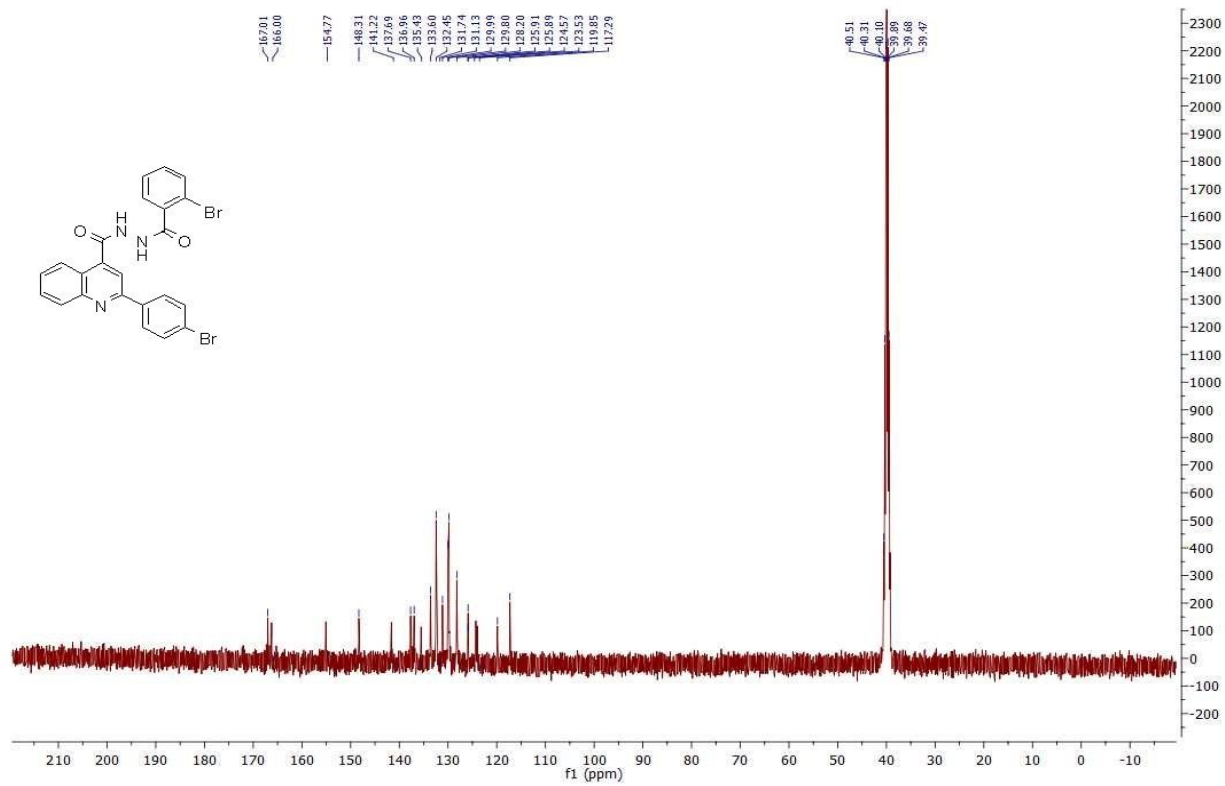

Figure S26: <sup>13</sup>C NMR spectrum of the compound 7e.

-7e #225-229 RT: 3.78-3.85 AV: 5 SB: 6 2.79, 2.48-2.54 NL: 1.43E2  
T: + c EI Full ms [40.00-1000.00]

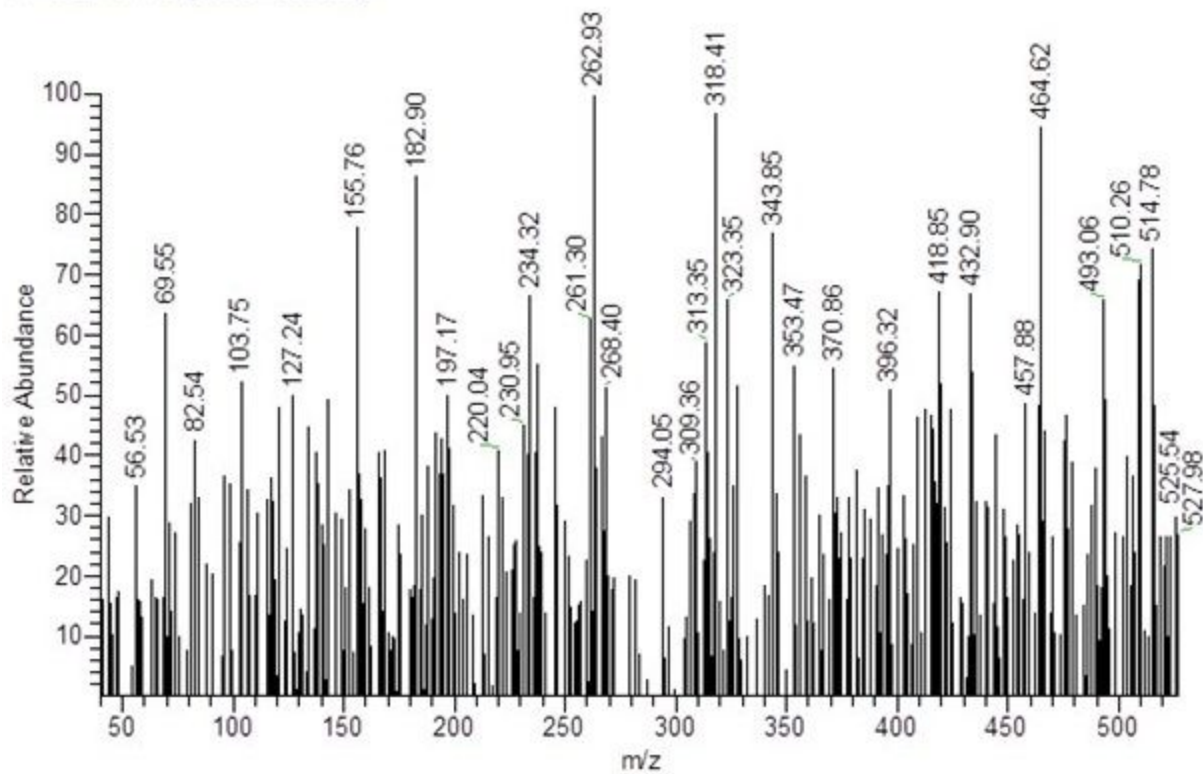

Figure S27: MS of the compound 7e.

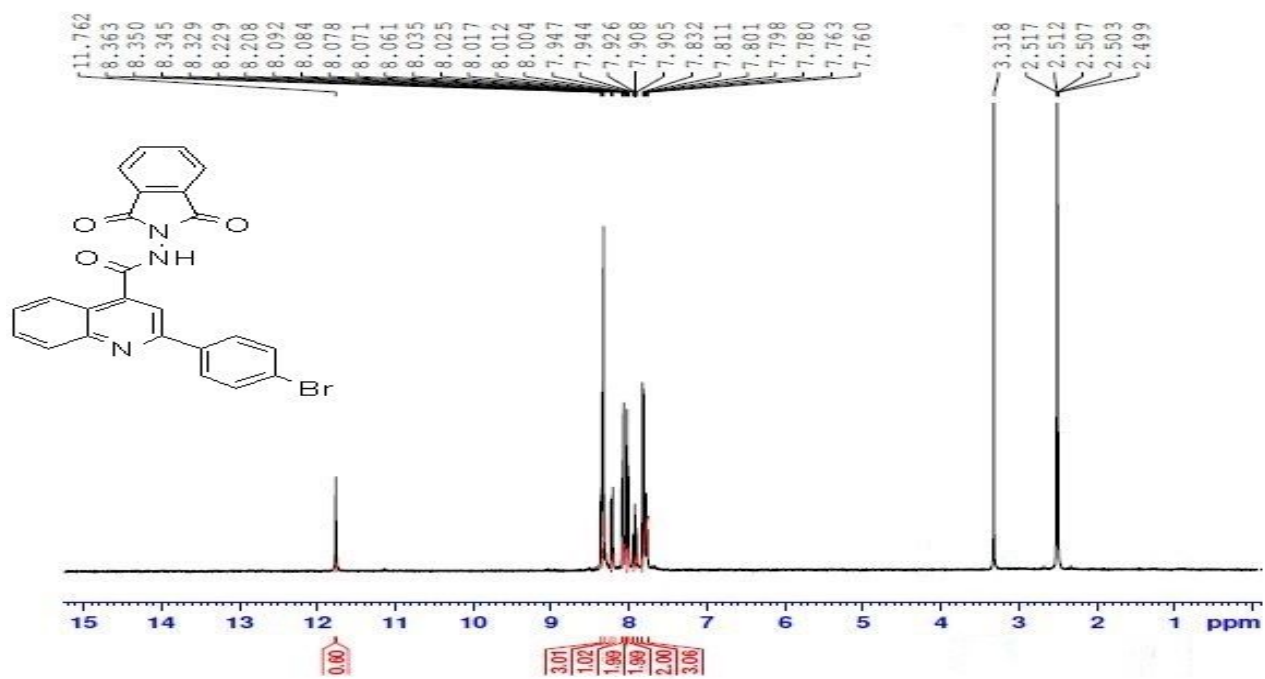

Figure S28: <sup>1</sup>H NMR spectrum of the compound 8.

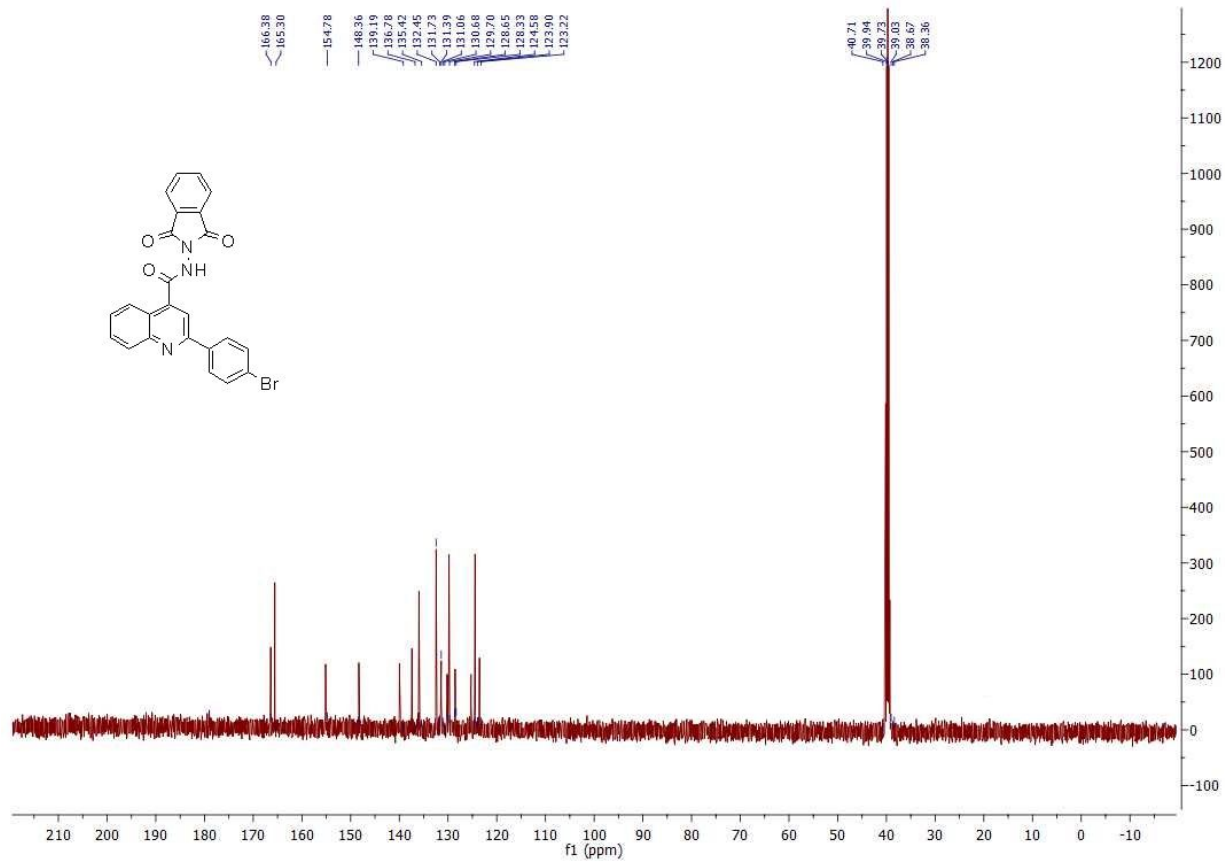

Figure S29:  $^{13}\text{C}$  NMR spectrum of the compound 8.

-8 #113-120 RT: 1.91-2.03 AV: 8 SB: 5 2.53 , 2.48-2.53 NL: 8.36E1  
T: + c EI Full ms [40.00-1000.00]

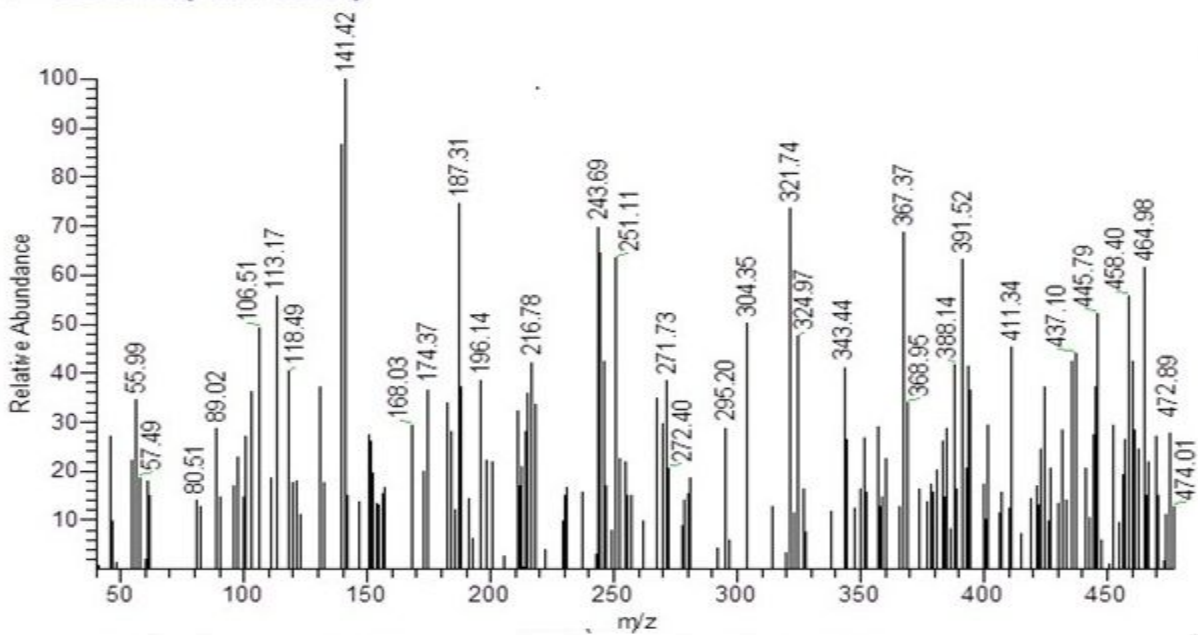

Figure S30: MS of the compound 8.

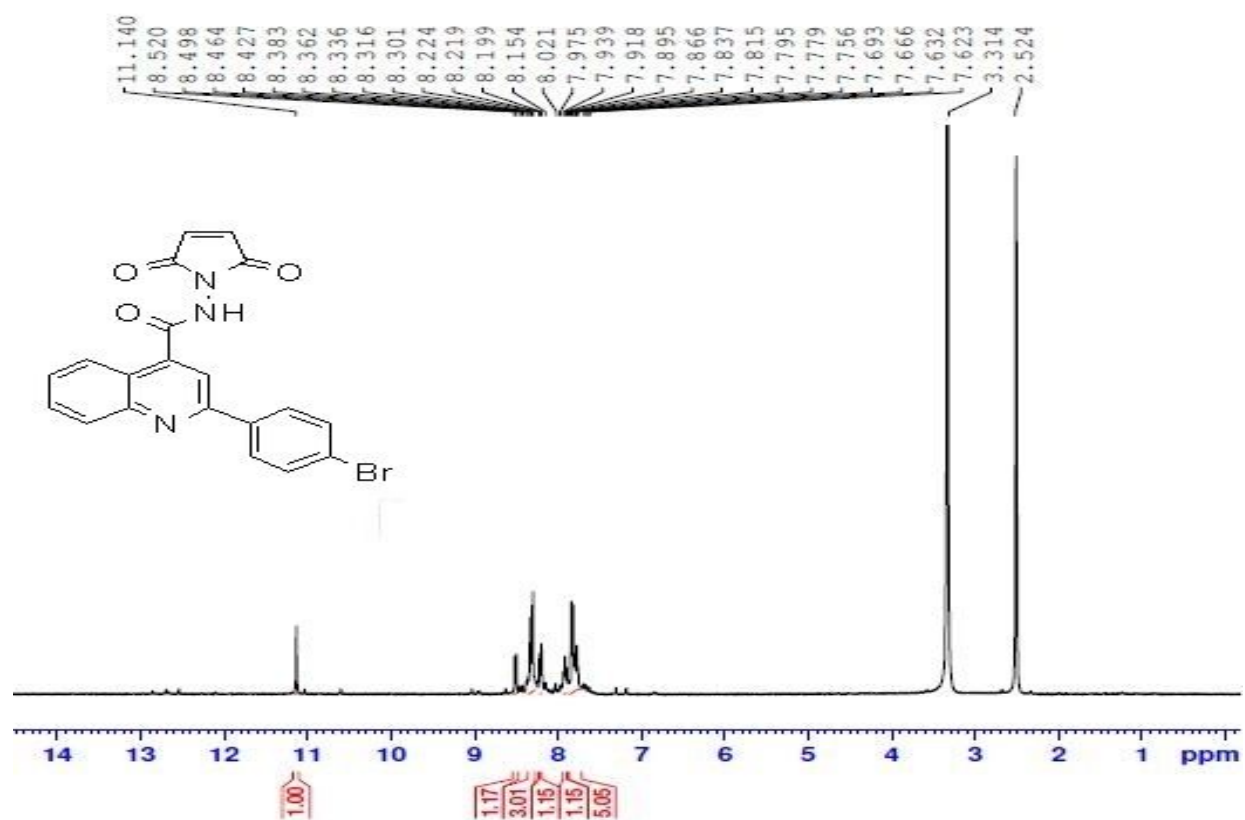

Figure S31: <sup>1</sup>H NMR spectrum of the compound 9.

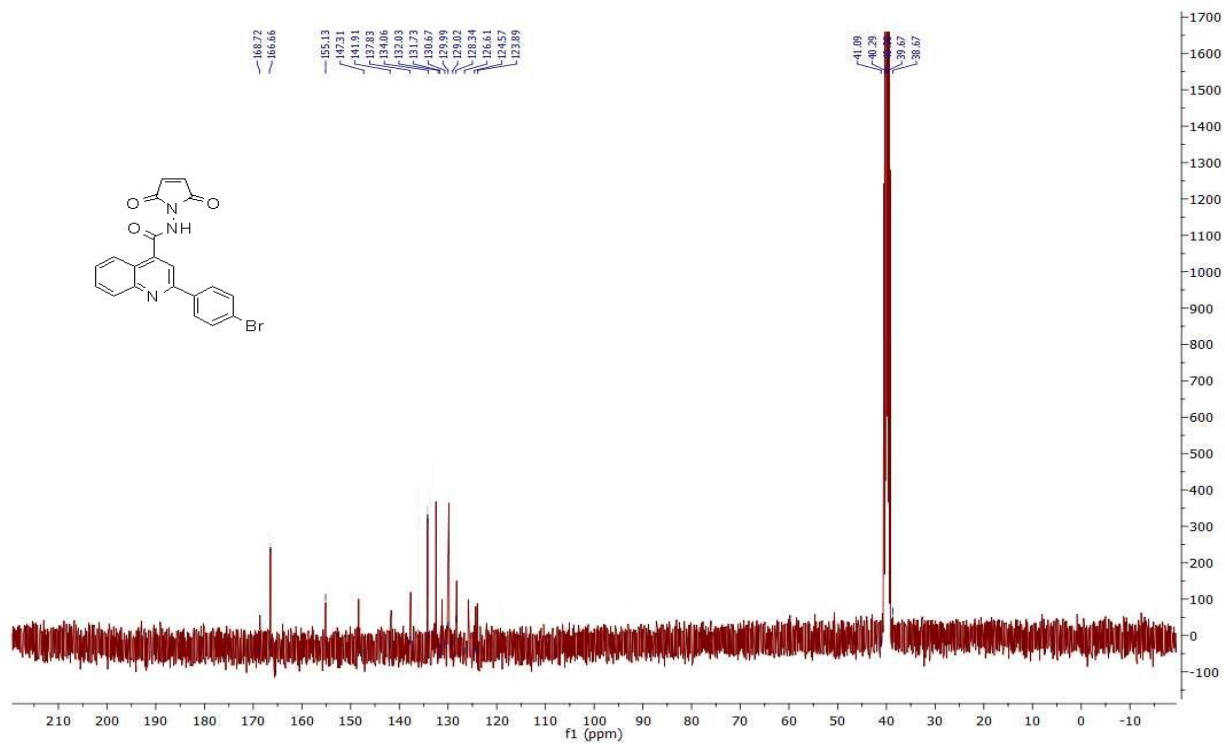

Figure S32: <sup>13</sup>C NMR spectrum of the compound 9.



9 #66-105 RT: 1.12-1.77 AV: 40 SB: 6 2.79 , 2.48-2.54 NL: 2.31E1  
T: + c EI Full ms [40.00-1000.00]

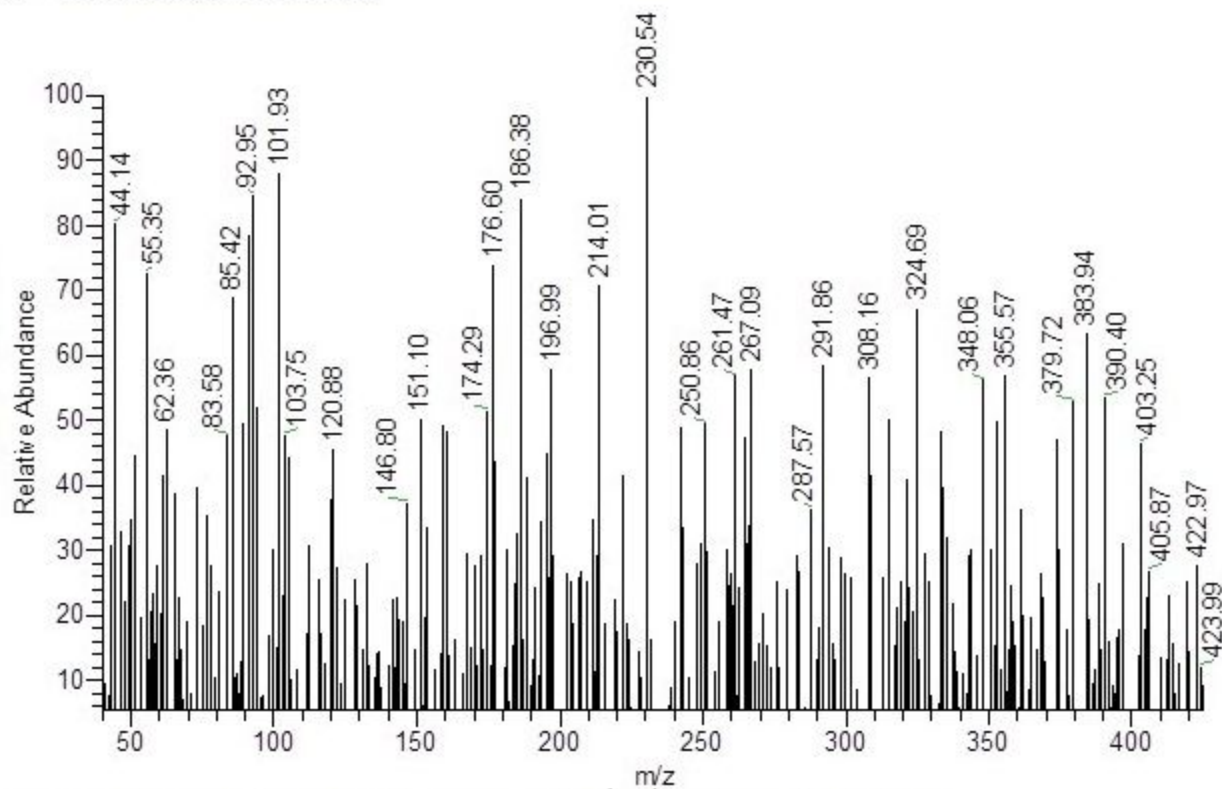

Figure S33: MS of the compound 9.

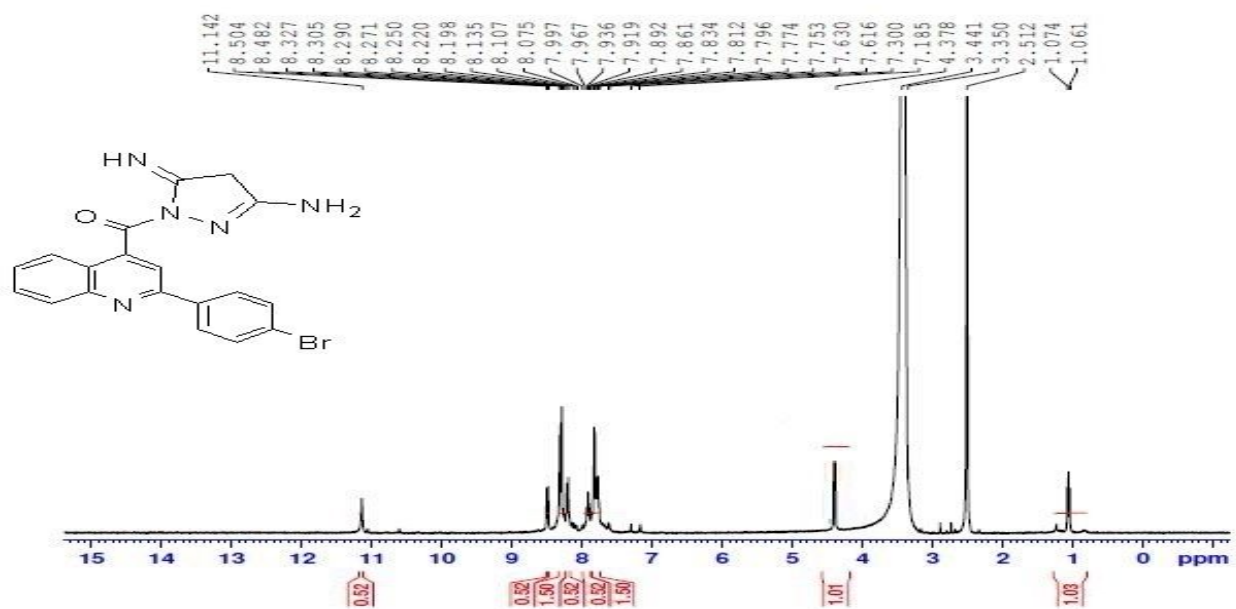

Figure S34: <sup>1</sup>H NMR spectrum of the compound 10.

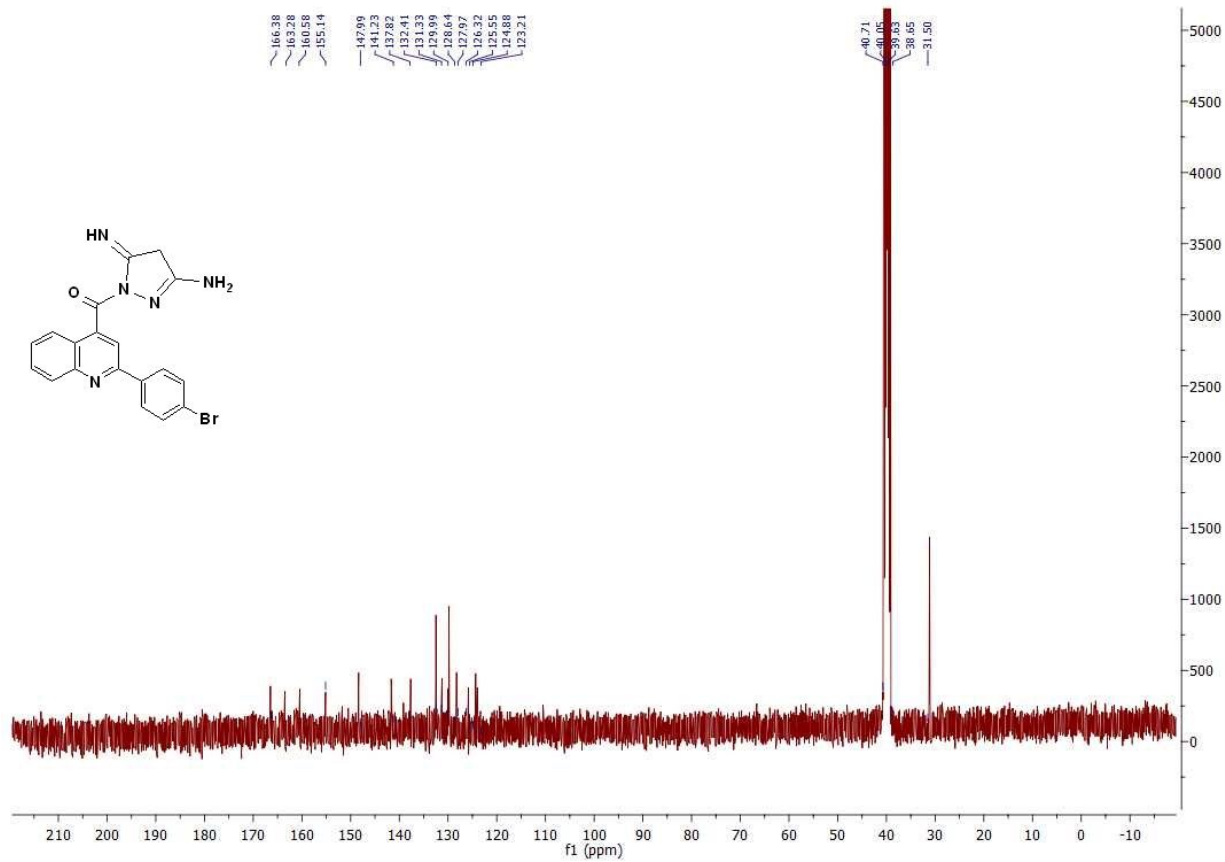

Figure S35:  $^{13}\text{C}$  NMR spectrum of the compound 10.

-10 #120-133 RT: 2.03-2.24 AV: 14 SB: 6 2.79 , 2.48-2.54 NL: 4.21E1  
T: + c EI Full ms [40.00-1000.00]

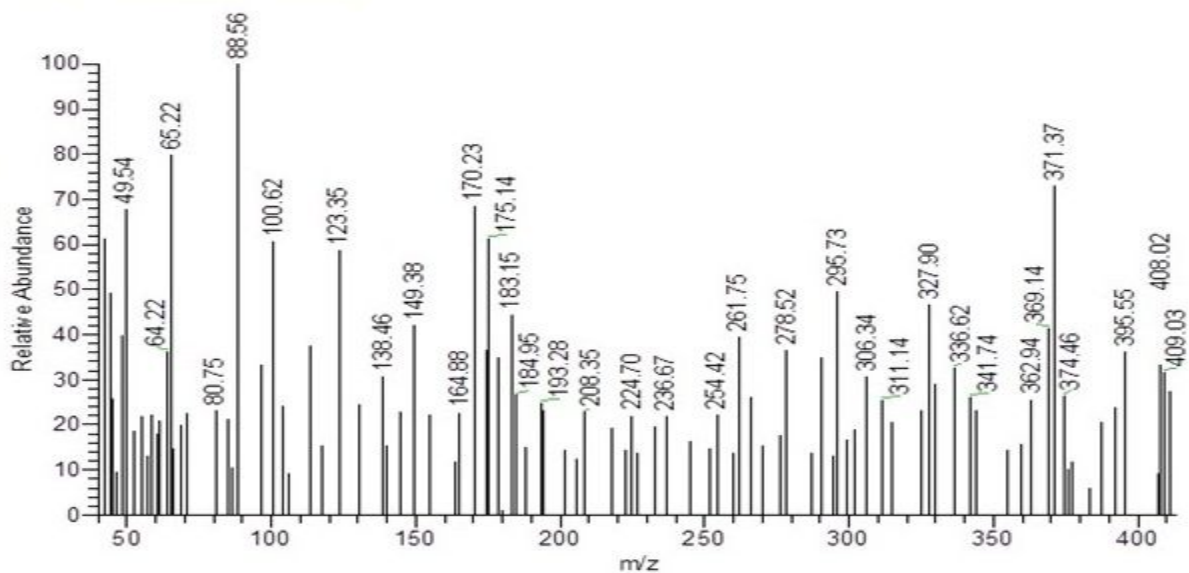

Figure S36: MS of the compound 10.

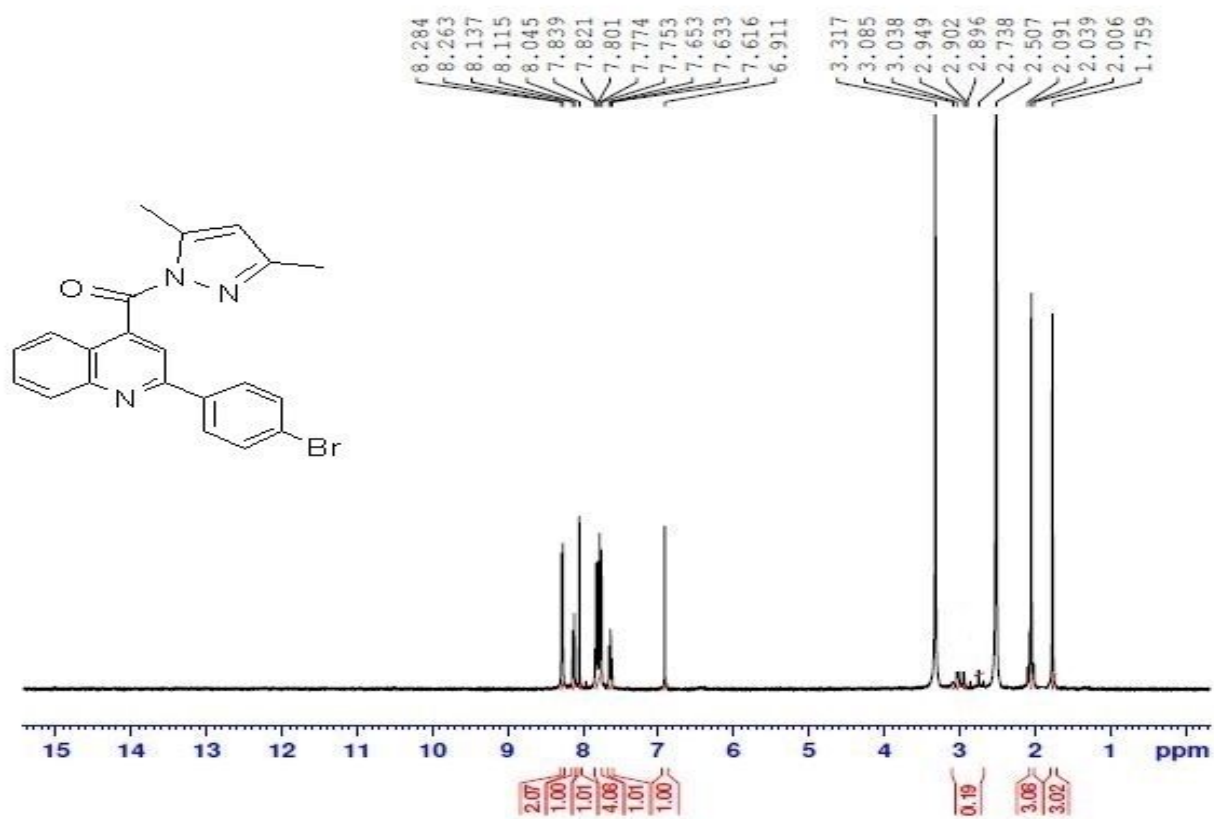

Figure S37: <sup>1</sup>H NMR spectrum of the compound 11.

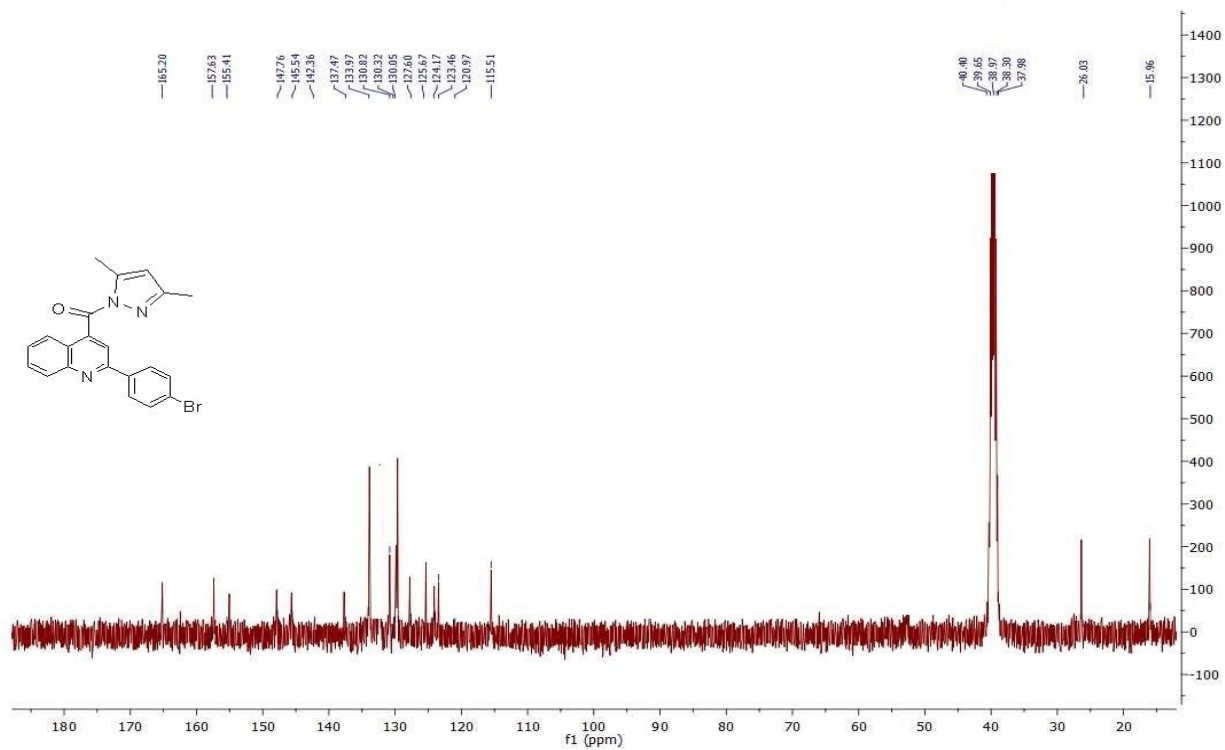

Figure S38:  $^{13}\text{C}$  NMR spectrum of the compound 11.

-11\_20220731133516#139 RT: 2.34 AV: 1 SB: 6 2.79 , 2.48-2.54 NL: 2.67E3  
T: + c EI Full ms [40.00-1000.00]

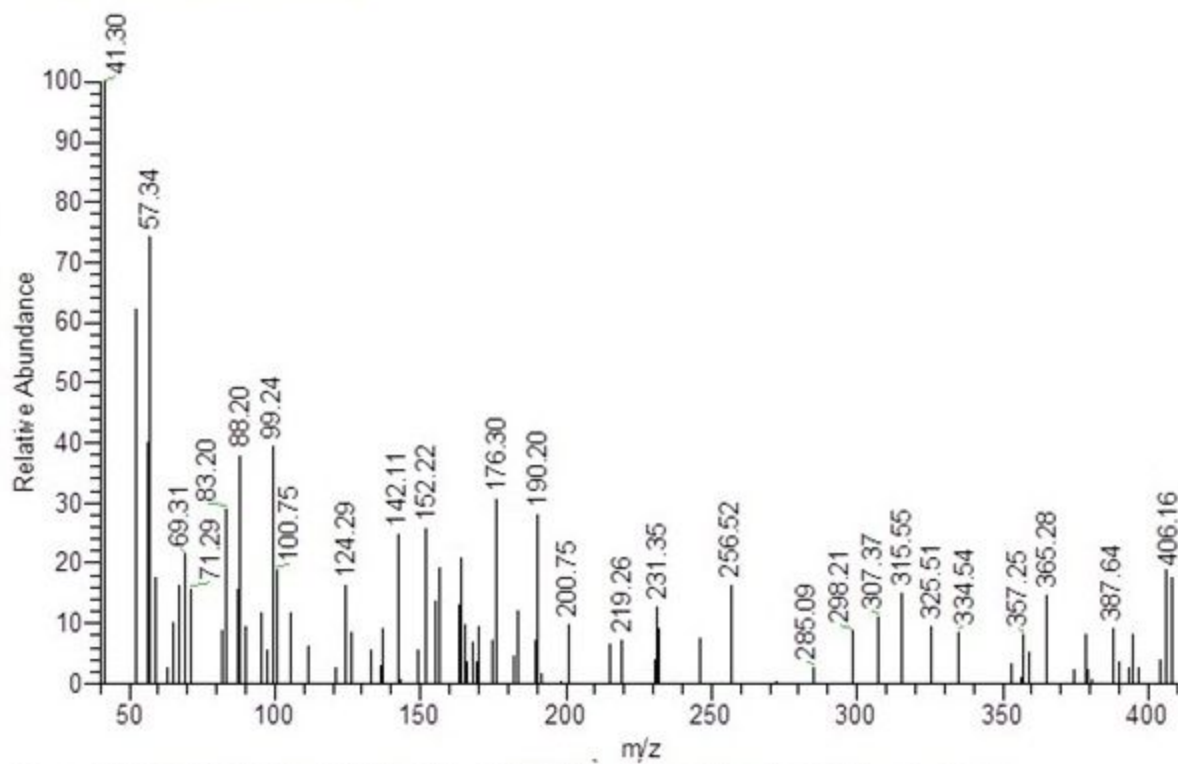

Figure S39: MS of the compound 11.

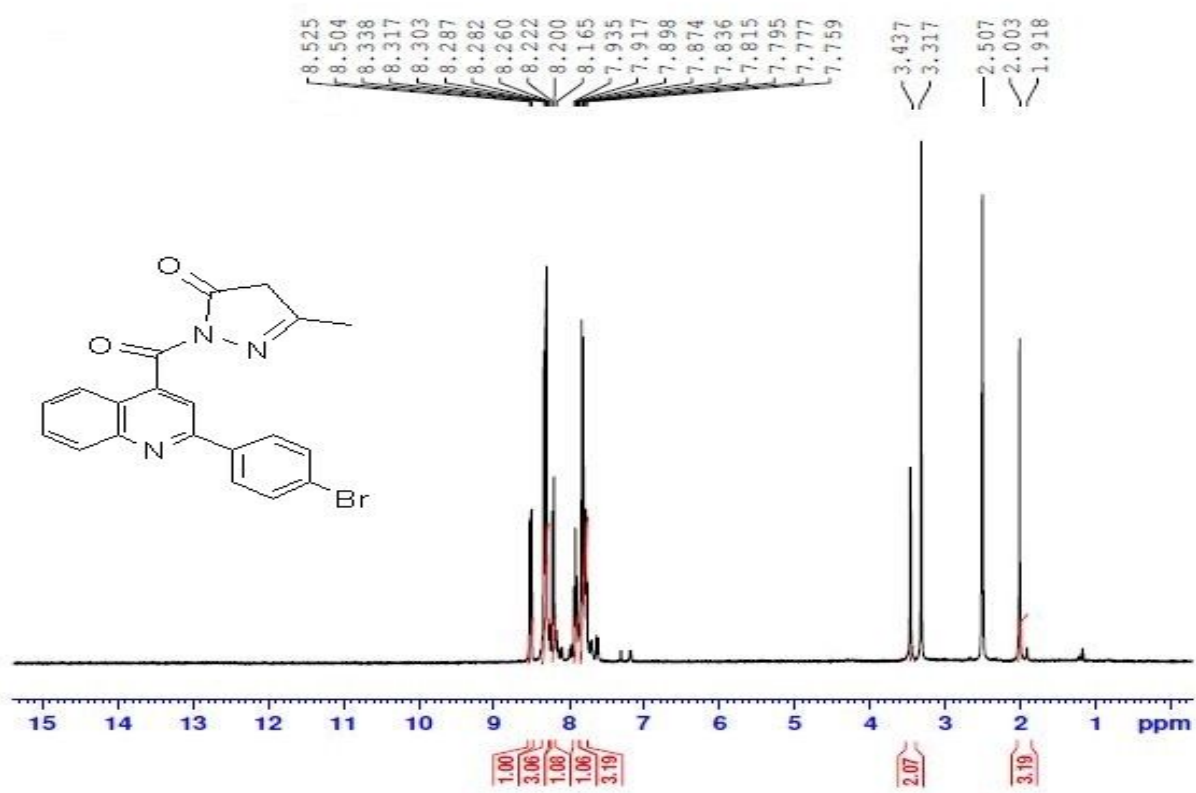

Figure S40: <sup>1</sup>H NMR spectrum of the compound 12.



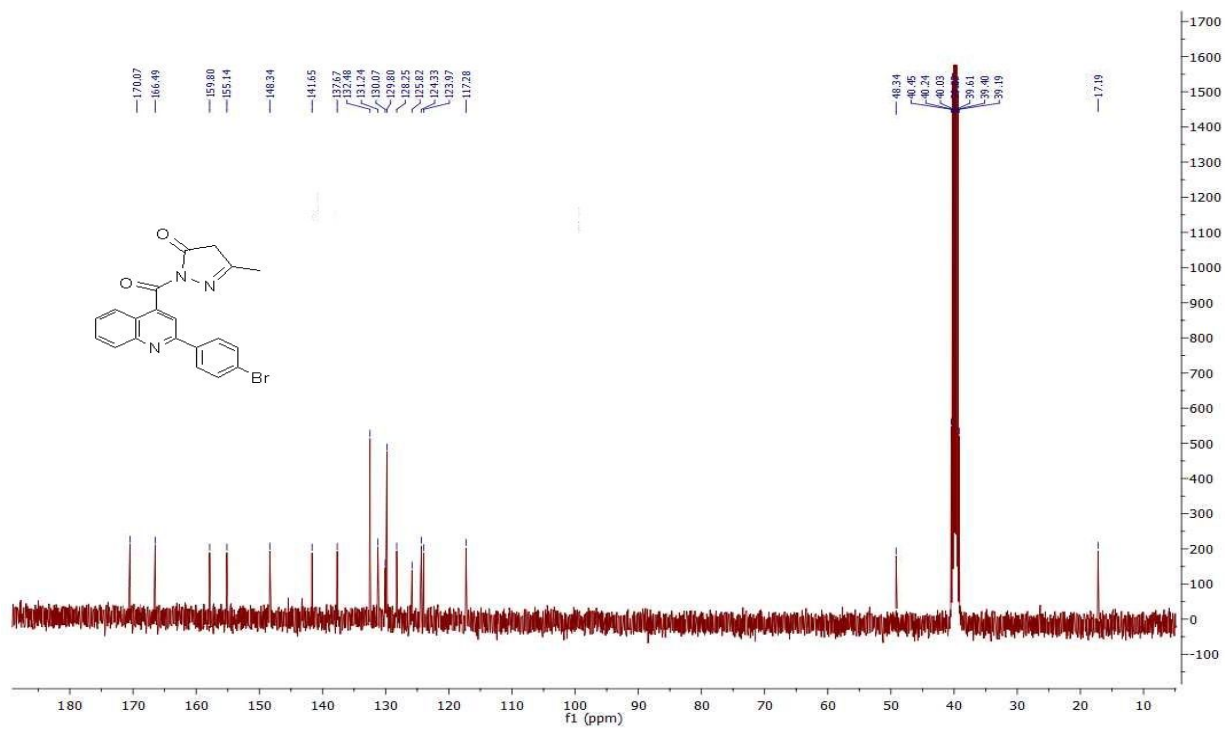

Figure S41: <sup>13</sup>C NMR spectrum of the compound 12.

-12 #152-158 RT: 2.56-2.66 AV: 7 SB: 6 2.79, 2.48-2.54 NL: 1.14E2  
T: + c EI Full ms [40.00-1000.00]

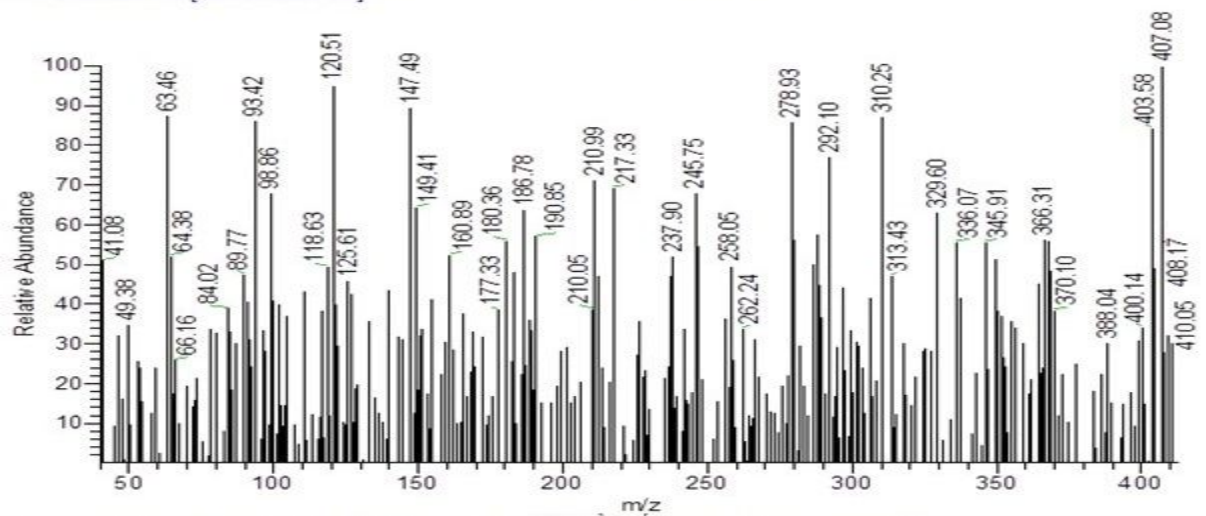

Figure S42: MS of the compound 12.

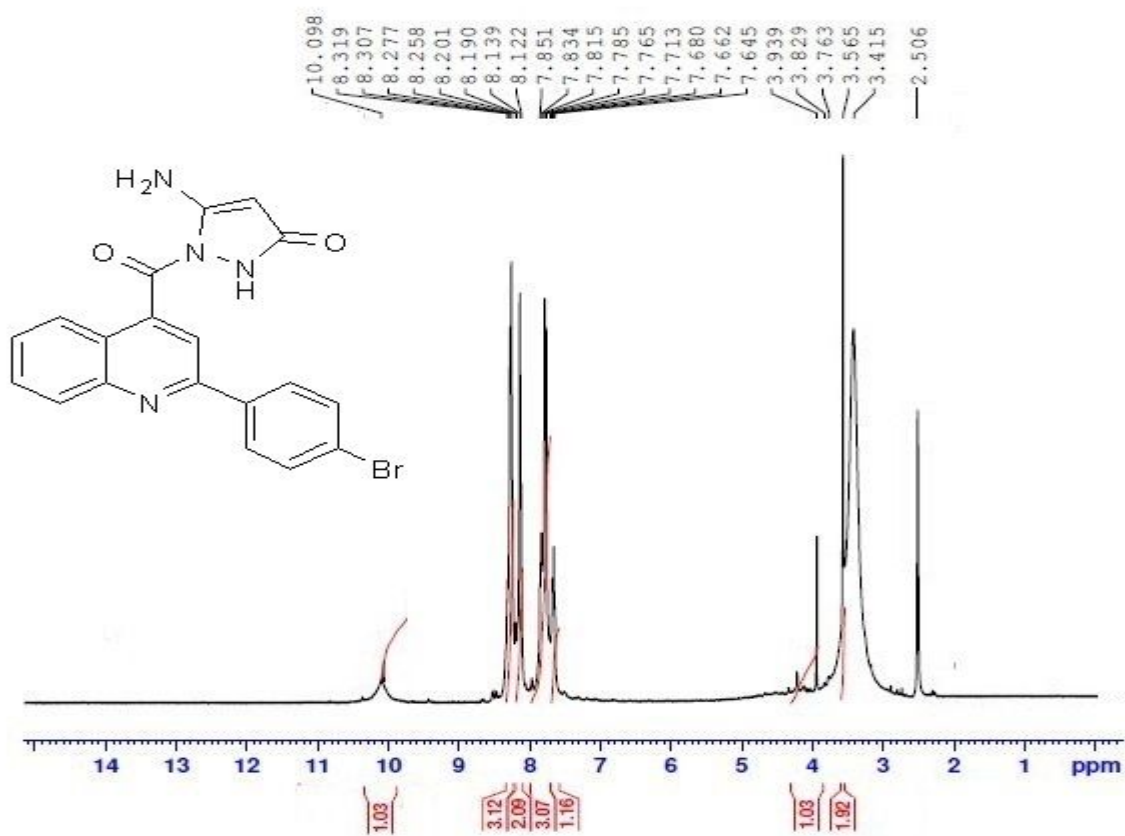

Figure S43: <sup>1</sup>H NMR spectrum of the compound 13.

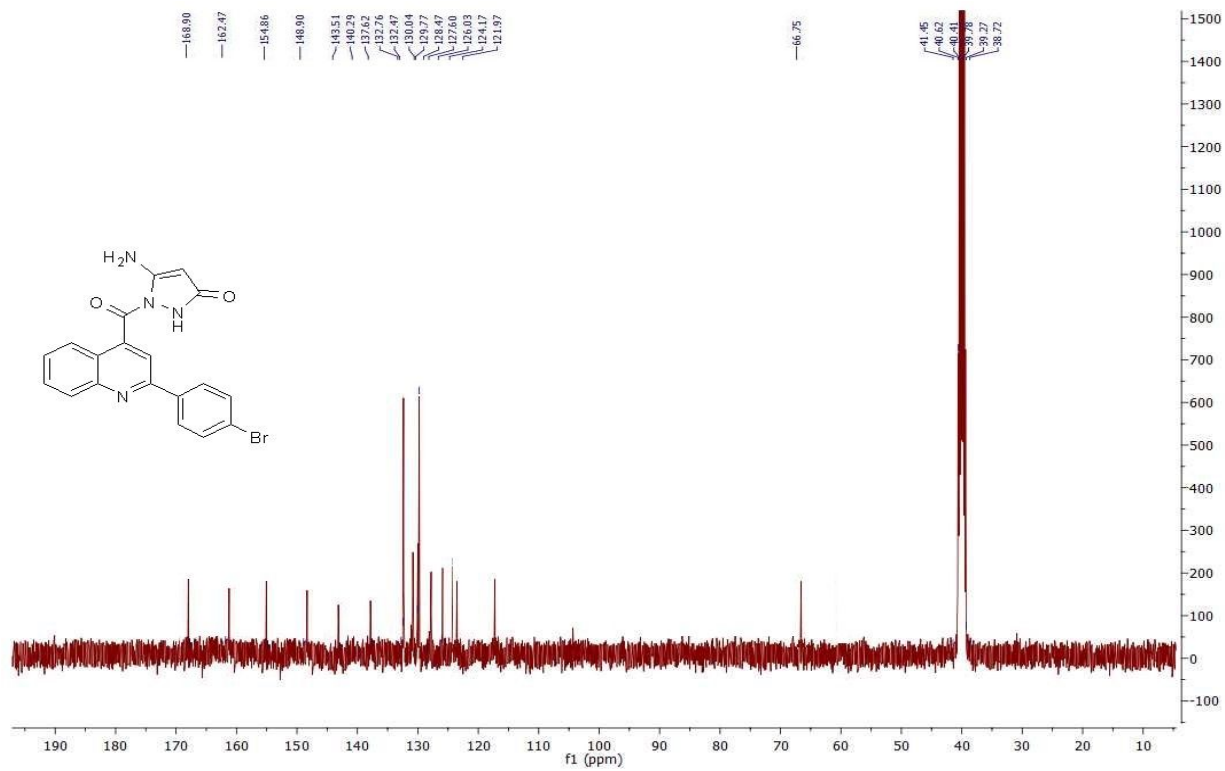

**Figure S44:**  $^{13}\text{C}$  NMR spectrum of the compound 13.

13#120-123 RT: 2.03-2.08 AV: 4 SB: 6 2.79, 2.48-2.54 NL: 1.49E2  
T: + c EI Full ms [40.00-1000.00]

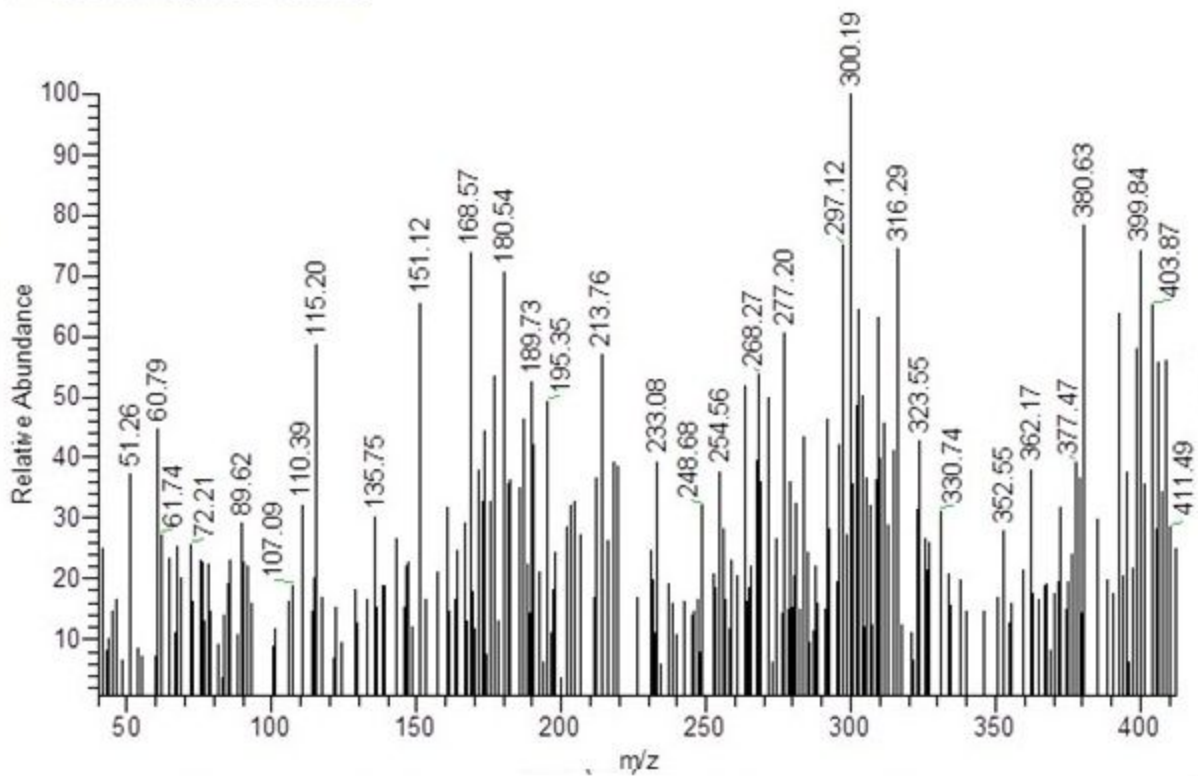

Figure S45: MS of the compound 13.

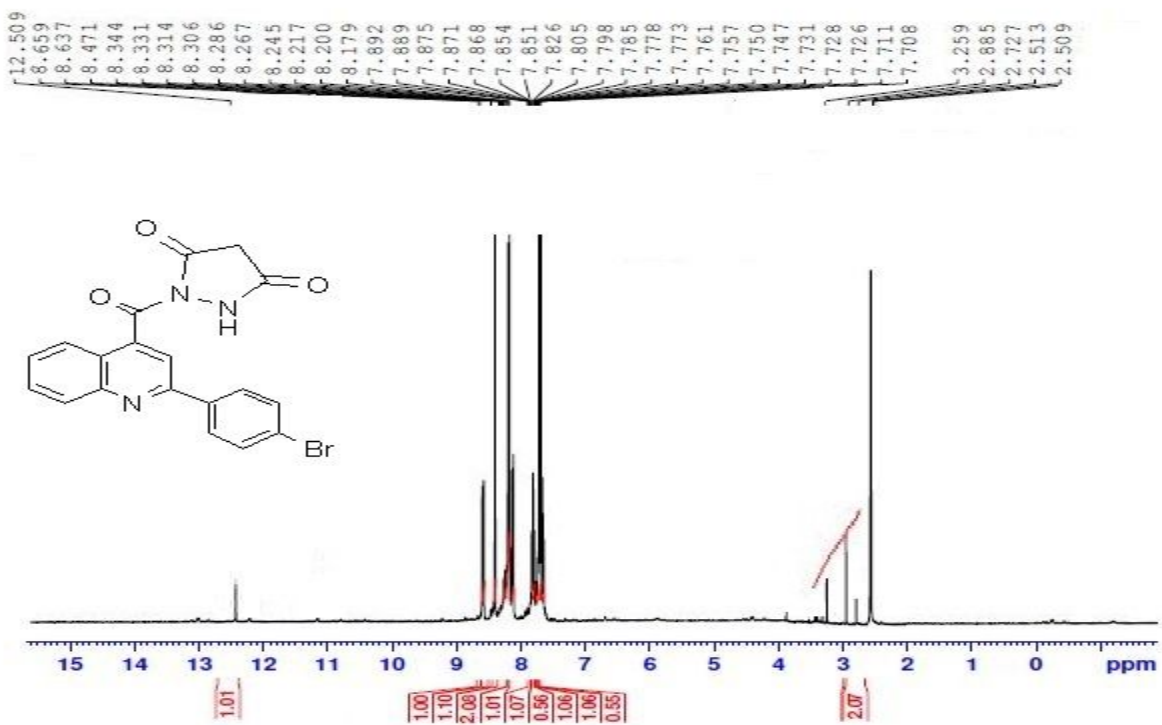

Figure S46: <sup>1</sup>H NMR spectrum of the compound 14.

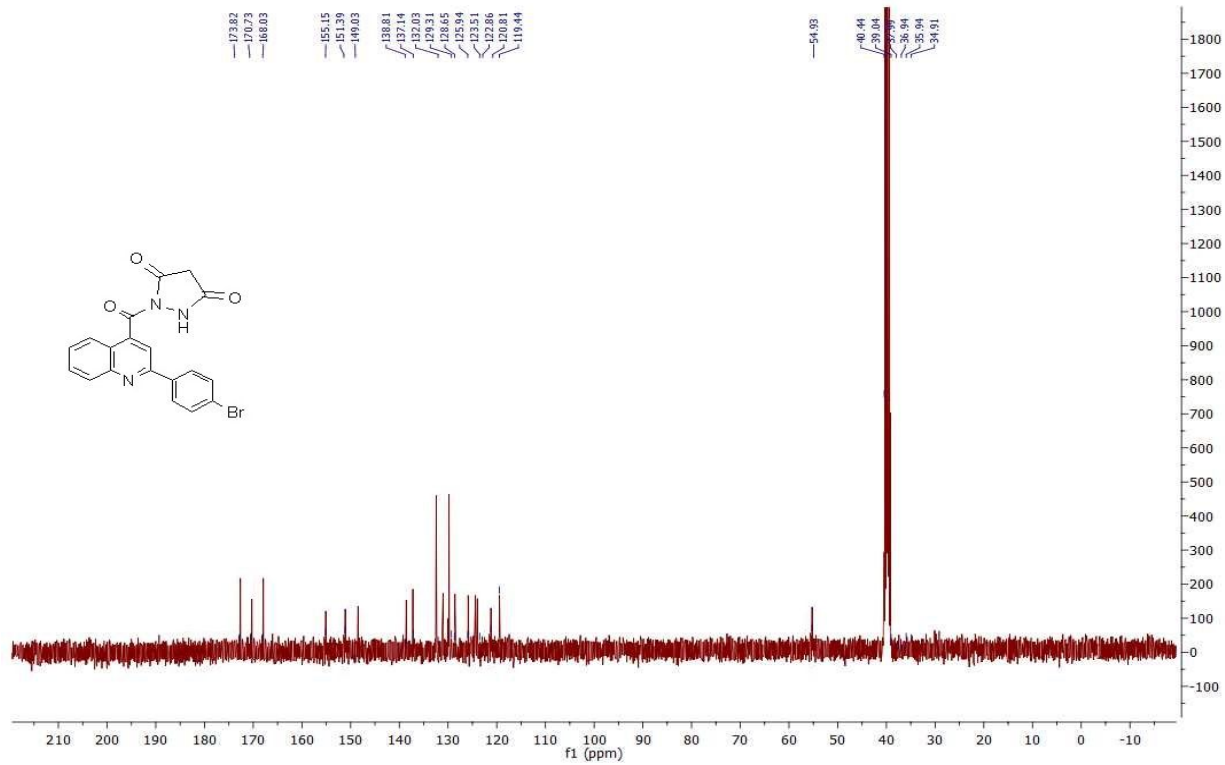

Figure S47:  $^{13}\text{C}$  NMR spectrum of the compound 14.

-14 #213-220 RT: 3.58-3.70 AV: 8 SB: 6 2.79 , 2.48-2.54 NL: 6.76E1  
T: + c EI Full ms [40.00-1000.00]

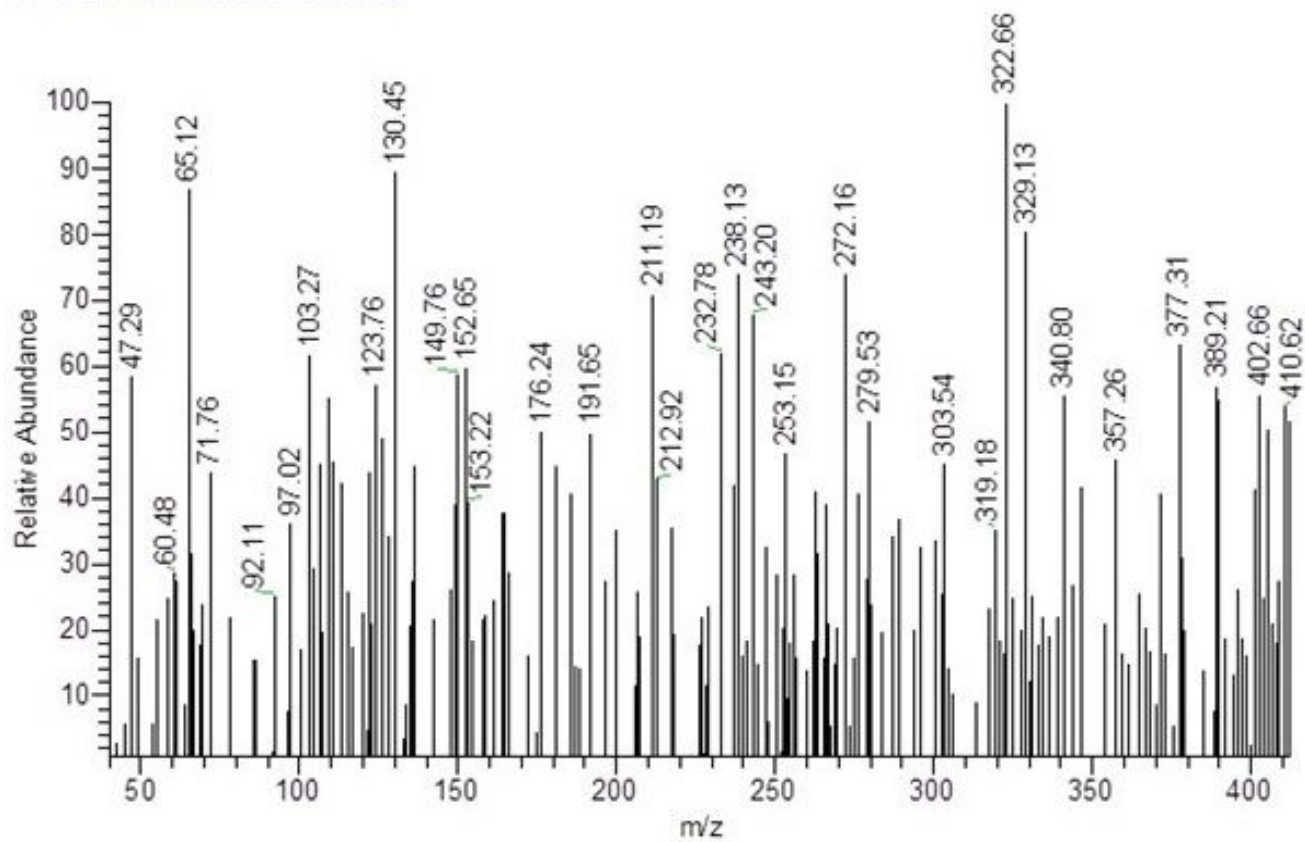

Figure S48: MS of the compound 14.



## **Part 3: Biological studies**

### **Appendix A**

#### **S4.2. Biology**

##### **S4.2.2. Agar well diffusion method**

10 mg from each compound was dissolved in 2ml of DMSO and 100 $\mu$ l from each compound was tested with a final dose of 500 $\mu$ g for each treatment. Nutrient agar plates were heavily inoculated regularly with 0.1ml of  $10^5$ - $10^6$  cells/ml in case of bacteria and yeast. Czapek-Dox agar plates seeded by 0.1ml ( $10^6$  cells/ml) the fungal inoculum was used to evaluate the antifungal activities. Three holes were initiated in each inoculated plate. 100microliter from each sample were dispensed in each cup. Then plates were kept at low temperature (4°C) for 2-4 hours to allow maximum diffusion. The plates were then incubated at 37°C for 24 hours for bacteria and at 30°C for 48 hours in upright position to allow maximum growth of the organisms. The antimicrobial activity of the test agent was determined by measuring the diameter of zone of inhibition expressed in millimeter (mm). The experiment was carried out more than once and mean of reading was recorded.

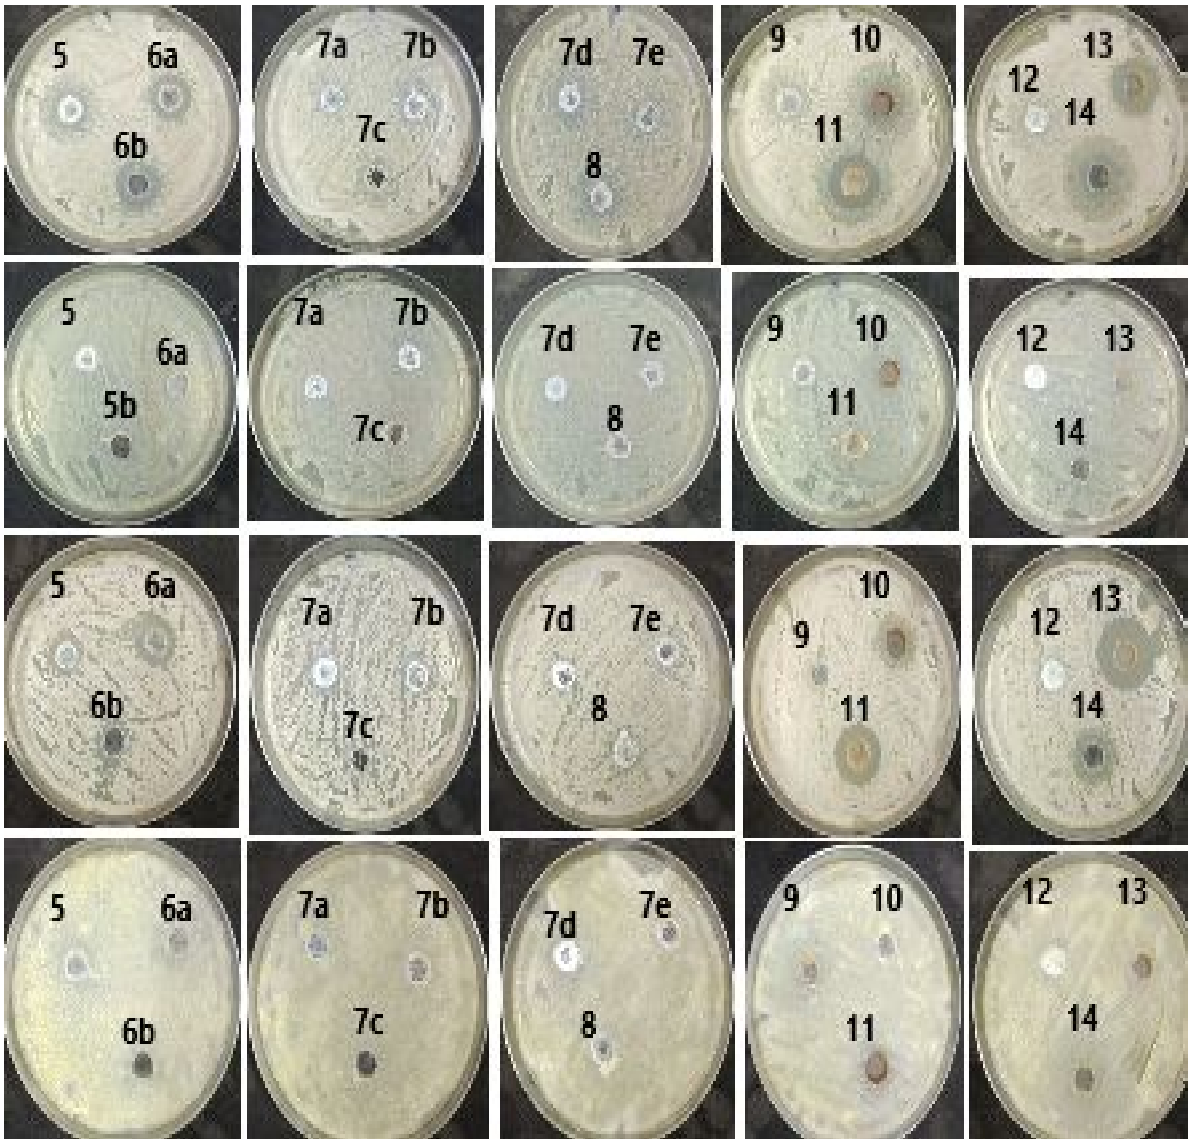

Figure S49: Agar well diffusion method

### **S4.2.3. MIC and MBC methodology**

#### **S4.2.3.1. Preparation of bacterial culture**

Bacterial cultures were prepared under sterile conditions by incubating 100 ml bottle with each test microbe, capped and incubated at 35 °C for 24 h. Clean bacterial cells were prepared by centrifuging the growth culture, under sterile condition, in cooling centrifuge at 400 rpm for 15 min. The bacterial cells were re-suspended using 20 mL of sterile normal saline and centrifuged again at 4000 rpm for 5 min. This step was repeated until the supernatant was clear. The pellet was then suspended in 20 mL of sterile normal saline. The optical density of the bacterial suspension was recorded at 500 nm, and serial dilutions were carried out with appropriate aseptic techniques until the optical density was in the range of 0.5–1.0. The actual number of colony-forming units was carried out to obtain a concentration of  $5 \times 10^6$  cfu/mL.

#### **S4.2.3.2. Preparation of resazurin solution**

The resazurin solution was prepared by dissolving a 675 mg in 100 mL of sterile distilled water and shake well with vortex mixer and sterilized by filtration through membrane filter (pore size of (0.22- 0.45  $\mu\text{m}$ )).

#### **S4.2.3.3. Preparation of the plates**

Microplates, 96 well were prepared and labelled under aseptic conditions. A volume of 500  $\mu\text{L}$  of test material in DMSO (a stock concentration of 5mg/mL for purified compounds) was pipetted into the first row of the plate. To all other wells 50  $\mu\text{L}$  of broth medium was added. Serial dilutions were performed. To each well 10 $\mu\text{L}$  of resazurin indicator solution was added, 10 $\mu\text{L}$  of bacterial suspension ( $5 \times 10^6$ cfu/mL) was added to each well. Each plate was wrapped loosely with parafilm to ensure that bacteria did not become dehydrated. The plates were prepared in duplicate and placed in an incubator set at 37°C for 18–24 h. The colour change was then assessed visually. Any colour changes from purple to pink or colourless were recorded as positive. The lowest concentration at which colour change occurred was taken as the MIC value.

#### **S4.2.3.4. Determination of minimum bactericidal concentrations (MBC's) of the effective plants extract**

Streaks were taken from the two lowest concentrations of the plant extract plates exhibiting invisible growth (from inhibition zone of MIC plates) and subcultures onto sterile nutrient agar plates. The plates were incubated at 35°C for 24 h. then examined for bacterial growth in corresponding to plant extract concentration. MBC was taken as the concentration of plant extract that did not exhibiting any bacterial growth on the freshly inoculated agar plates.[1]

#### **S4.2.3.5. Minimum biofilm inhibitory concentration (MBIC) assay**

Inhibin of biofilm formation has been evaluated using 96-well microplates assay method.[2] In each well 200 µl of LB (Lauria broth) has been added. To the first well, 100 µl of the tested compound was added and two-fold dilution has been performed leaving the last two wells as control. To each well, 10 µl of the previously prepared microbial culture (0.5 McFarland standard,  $5 \times 10^5$  CFU/ml) were added. After incubating the plates at 37 °C for 24 h, the culture was gently decanted and then washed by phosphate buffered saline (PBS) buffer. The plates were left to dry for 30 min and 200 µl of crystal violet 0.1% was added to each well and left for 30 min. the excess crystal violet was decanted and washed-out three times with distilled water and left to dry for 30 min. Finally, 200 µl of 95% ethanol was added to each well and the absorbance was measured at 492 nm using ELISA reader.

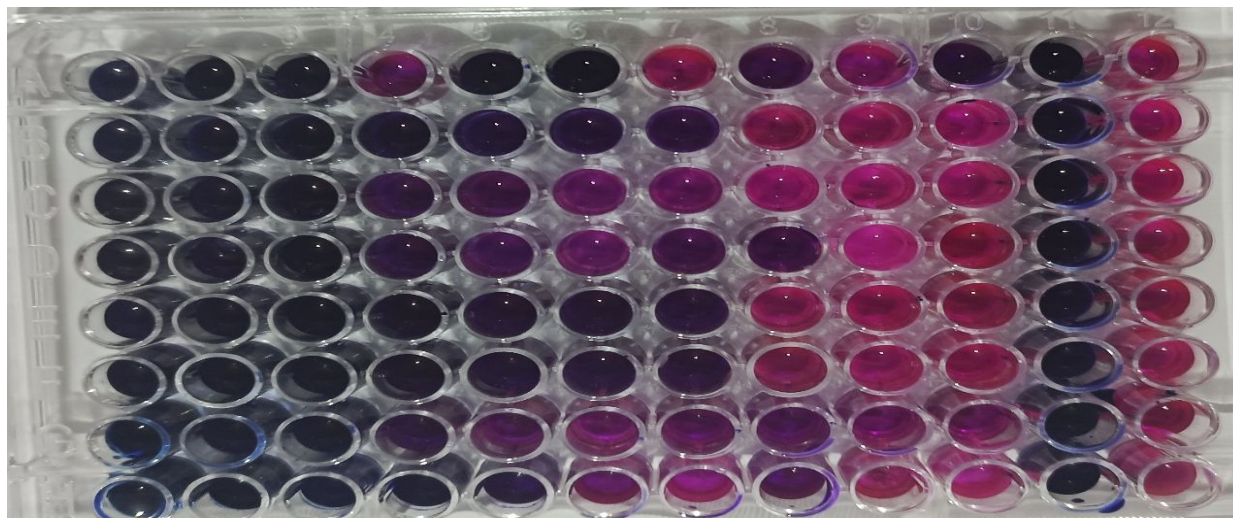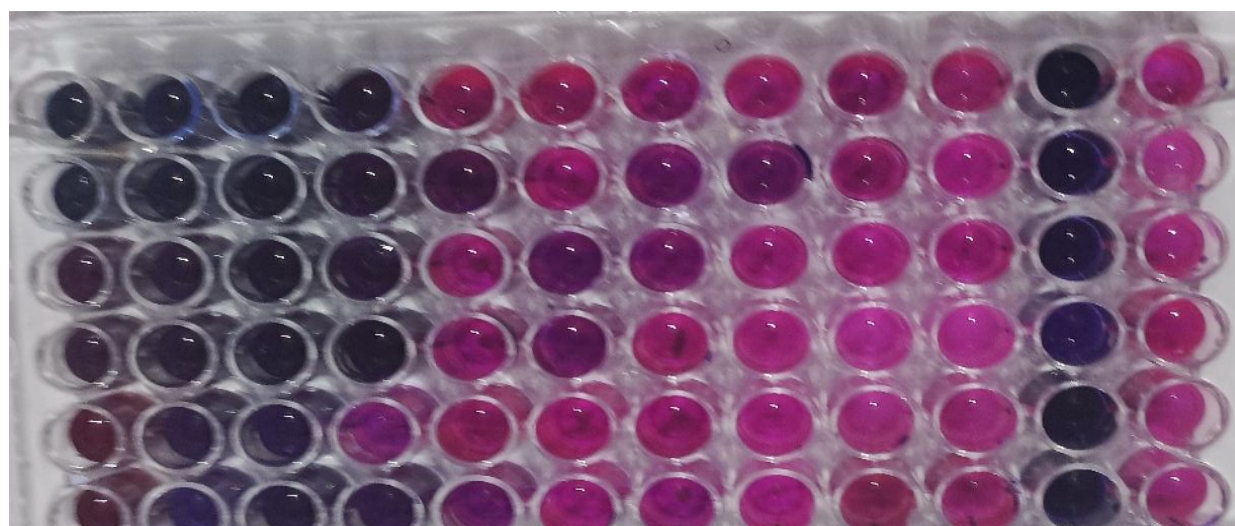

**Figure S50:** The MIC and MBC assay of compounds **5**, **6a**, **6b**, **10**, **11**, **13** and **14** against *S. aureus*

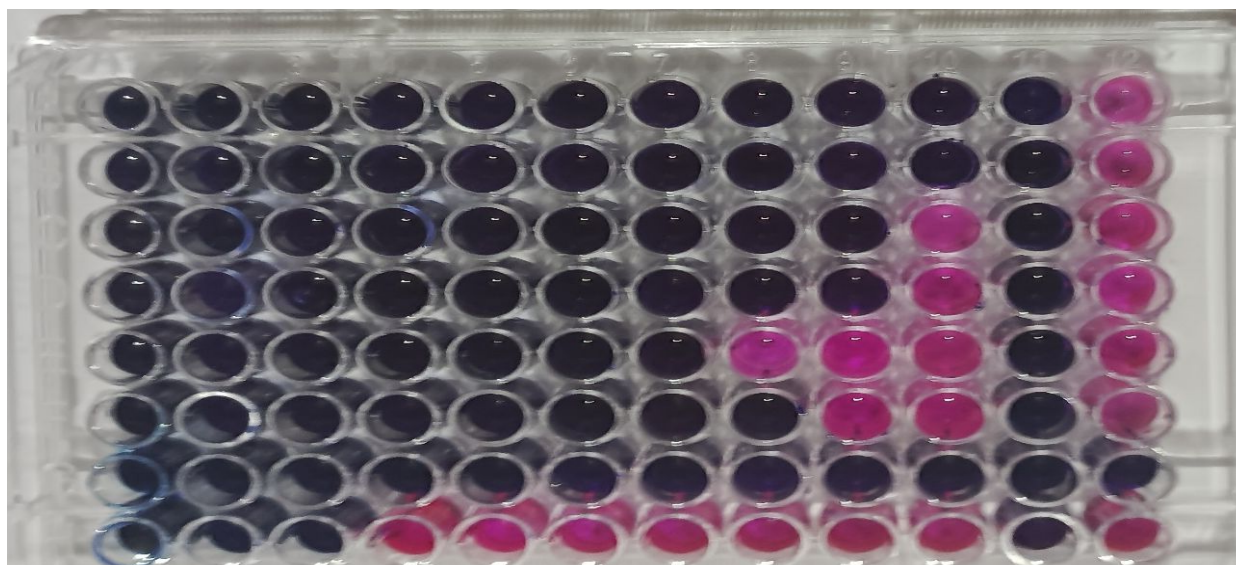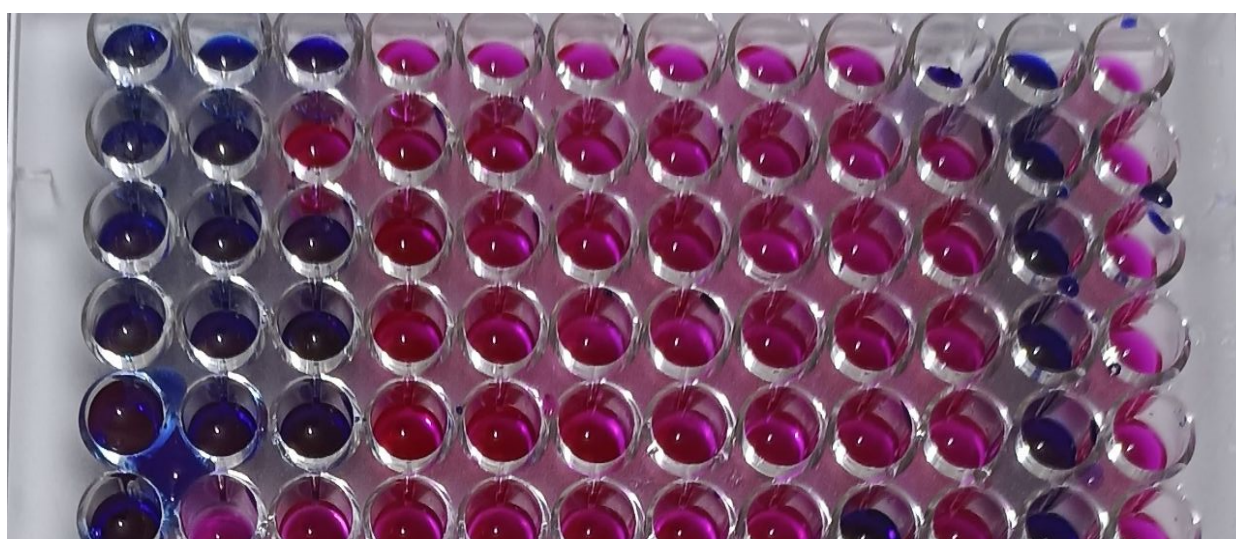

**Figure S51:** The MIC and MBC assay of compounds of **5**, **6a**, **6b**, **10**, **11**, **13** and **14** against *C. albicans*

## References

1. Sarker, S. D.; Nahar, L.; Kumarasamy, Y. Microtitre plate-based antibacterial assay incorporating resazurin as an indicator of cell growth, and its application in the in vitro antibacterial screening of phytochemicals. *Methods* **2007**, *42*, pp. 321-324.
2. Ceri, H.; Olson, M. E.; Morck, D. W.; Storey, D. G. *Minimal biofilm eradication concentration (MBEC) assay: susceptibility testing for biofilms*. in *Biofilms, infection, and antimicrobial therapy*. CRC Press, 2005; pp. 275-288.
